1 **Hyperactive end joining repair mediates resistance to DNA damaging therapy in p53-**  
2 **deficient cells**

3  
4

5 Rashmi J. Kumar<sup>1,2</sup>, Hui Xiao Chao<sup>3</sup>, Victoria R. Roberts<sup>1</sup>, Aurora R. Sullivan<sup>1</sup>, Sonam J. Shah<sup>1</sup>,  
6 Dennis A. Simpson<sup>1</sup>, Wanjun Feng<sup>1</sup>, Anne-Sophie Wozny<sup>1</sup>, Sunil Kumar<sup>1</sup>, Jeremy E. Purvis<sup>3,4</sup>,  
7 Gaorav P. Gupta<sup>1,2,5,6,#</sup>

8 <sup>1</sup>Lineberger Comprehensive Cancer Center, University of North Carolina at Chapel Hill, Chapel  
9 Hill, NC, 27599, USA

10 <sup>2</sup>Curriculum in Genetics and Molecular Biology, University of North Carolina at Chapel Hill,  
11 Chapel Hill, NC, 27599, USA

12 <sup>3</sup>Curriculum in Bioinformatics and Computational Biology, University of North Carolina at Chapel  
13 Hill, Chapel Hill, NC, 27599, USA

14 <sup>3</sup>Department of Computational Medicine, University of North Carolina at Chapel Hill, Chapel Hill,  
15 NC, 27599, USA

16 <sup>4</sup>Department of Genetics, University of North Carolina at Chapel Hill, Chapel Hill, NC, 27599,  
17 USA

18 <sup>5</sup>Department of Radiation Oncology, University of North Carolina at Chapel Hill, Chapel Hill, NC,  
19 27599, USA

20 <sup>6</sup>Department of Biochemistry and Biophysics, University of North Carolina at Chapel Hill, Chapel  
21 Hill, NC, 27599, USA

22

23

24

25 **#Correspondence:**

26 Gaorav P. Gupta, MD PhD

27 Assistant Professor

28 Department of Radiation Oncology

29 Department of Biochemistry and Biophysics

30 University of North Carolina at Chapel Hill

31 Chapel Hill, NC 27599

32 [gaorav\\_gupta@med.unc.edu](mailto:gaorav_gupta@med.unc.edu)

## 33 **Abstract**

34 *TP53* mutations in cancer are associated with poor patient outcomes and resistance to  
35 DNA damaging therapies<sup>1-3</sup>. However, the mechanisms underlying treatment resistance  
36 in p53-deficient cells remain poorly characterized. Here, we show that p53-deficient cells  
37 exhibit hyperactive repair of therapy-induced DNA double strand breaks (DSBs), which is  
38 suppressed by inhibition of DNA-dependent protein kinase (DNA-PK). Single-cell  
39 analyses of DSB repair kinetics and cell cycle state transitions reveal an essential role for  
40 DNA-PK in suppressing S phase DNA damage and mitotic catastrophe in p53-deficient  
41 cells. Yet, a subset of p53-deficient cells exhibit intrinsic resistance to therapeutic DSBs  
42 due to a repair pathway that is not sensitive to DNA-PK inhibition. We show that p53  
43 deficiency induces overexpression of DNA Polymerase Theta (Pol  $\theta$ ), which mediates an  
44 alternative end-joining repair pathway that becomes hyperactivated by DNA-PK  
45 inhibition<sup>4</sup>. Combined inhibition of DNA-PK and Pol  $\theta$  restores therapeutic DNA damage  
46 sensitivity in p53-deficient cells. Thus, our study identifies two targetable DSB end joining  
47 pathways that can be suppressed as a strategy to overcome resistance to DNA-damaging  
48 therapies in p53-deficient cancers.

## 49 **Introduction**

50  
51 *TP53* is the most commonly mutated tumor suppressor gene<sup>5</sup>. p53 mediates  
52 pleiotropic tumor suppressive effects through regulation of cell cycle arrest, apoptosis,  
53 and cellular metabolism in response to cellular stress<sup>6,7</sup>. Beyond its role as a tumor  
54 suppressor, loss of functional p53 is associated with poor prognostic outcomes across  
55 many different cancer types<sup>1,8-10</sup>. There is both clinical and preclinical evidence that p53-  
56 deficient cancers exhibit resistance to a variety of DNA damaging therapies<sup>2,3,11-14</sup>.

57           The mechanisms for therapeutic resistance in p53-deficient cells remains poorly  
58 characterized. Past work has suggested a role for loss of p53-mediated apoptosis<sup>12,15</sup>.  
59 However, the response of epithelial cancer cells to DNA damaging therapy is often  
60 determined by the efficiency of inducing senescence or mitotic catastrophe, rather than  
61 apoptosis<sup>16,17</sup>. p53 is also a transcription factor that responds to DNA double strand  
62 breaks (DSBs) to determine cellular fate<sup>7,18</sup>. Recent insights have revealed the  
63 importance of p53-signaling waves in regulation of cellular fate decisions of quiescence  
64 versus cell cycle re-entry after DNA damage<sup>19,20</sup>. However, the mechanisms that  
65 determine such cell fate decisions upon DNA damage induction in p53-mutant epithelial  
66 cells have not been established, and may lead to novel strategies to restore treatment  
67 sensitivity.

68           In this study, we investigate altered DNA repair mechanisms in p53 deficiency as  
69 a major contributor to resistance to DNA damaging therapies. We find that p53-deficient  
70 cells exhibit hyperactive repair and accelerated resolution of DNA damage foci. Utilizing  
71 live-cell imaging, we show that this ability to resolve DNA damage rapidly is partially  
72 dependent on DNA-PK, a critical serine/threonine kinase in the non-homologous end  
73 joining (NHEJ) pathway<sup>21</sup>. Inhibition of DNA-PK using the small molecule inhibitor  
74 NU7441 partially sensitizes p53-deficient cells to DSB inducing agents. We further show  
75 that this effect is specifically due to propagation of S phase related damage leading to  
76 mitotic catastrophe, highlighting a role for DNA-PK in S phase DNA damage repair that  
77 was previously under appreciated. Furthermore, using chromosomal break repair assays  
78 we show that in the context of inhibitor treatment, some p53-deficient cells utilize  
79 alternative end-joining repair in a compensatory manner to escape cell death. Thus, our

80 work provides critical insight into a clinically-relevant mechanism for why p53-deficient  
81 cells are resistant to DNA damaging therapies.

## 82 **Results**

### 83 **p53-deficient cells exhibit radioresistance and accelerated resolution of DNA DSBs**

84 We first established an isogenic cell system to investigate determinants of  
85 treatment-induced cell fate in p53-deficient cells. In order to minimize potential  
86 contributions of accessory mutations on phenotypes observed in cancer cell line models,  
87 we used CRISPR/Cas9 to disrupt *TP53* in the p53-proficient immortalized epithelial cell  
88 line model hTert-RPE1 (“RPE1”), which has also been a preferred model for investigating  
89 p53-dependent cell fate<sup>18,20,22</sup>. Two independent CRISPR/Cas9-targeted *TP53*<sup>-/-</sup> RPE1  
90 clones were selected for further study after confirming cells were deficient for p53 protein  
91 and lacked p53-dependent transcriptional induction of p21 in response to ionizing  
92 radiation (IR) (Supplementary Fig. 1a-c).

93 To assess whether p53 deficiency confers a proliferative advantage when treated  
94 with ionizing radiation, we performed a mixed competition assay. We took mCherry  
95 labelled RPE1 and mixed them with equal numbers of unlabeled *TP53*<sup>-/-</sup> RPE1 or p53-  
96 proficient RPE1 (control) (Fig. 1a). We quantified the relative abundance of the unlabeled  
97 cells after to exposure to IR (0 – 6Gy), normalized to untreated samples at each timepoint.  
98 RPE1 labeled and unlabeled cells maintained stable representation across time and  
99 treatment conditions (Supplementary Fig. 1d). Additionally, p53-deficient cells did not  
100 demonstrate a proliferation advantage in the absence of RT. However, treatment with IR  
101 at any dose level led to substantial positive selection for p53-deficient cells(Fig. 1b,c).  
102 We also observed that p53 deficiency induced resistance to the radiomimetic clastogen,



103 Neocarzinostatin (NCS) by colony forming assay (Supplementary Fig. 1e-i). Thus p53  
104 deficiency in this isogenic model is sufficient to induce radioresistance.

105 Unrepaired DSBs can suppress proliferation through the engagement of DNA  
106 damage-induced cell cycle checkpoints. We examined kinetics of DSB repair by  
107 performing immunofluorescence for 53BP1 and  $\gamma$ H2AX after treatment of p53 WT and  
108 *TP53*<sup>-/-</sup> cells with 5Gy IR (Fig. 1d,e and Supplementary Fig. 1j,k). We observed a  
109 reduction in the number of 53BP1 damage foci in *TP53*<sup>-/-</sup> cells as early as 30 minutes  
110 after treatment, that became even more pronounced by 4 hours post-treatment (Fig.  
111 1d,e). Similar patterns of reduced foci formation were also apparent with  $\gamma$ H2AX staining  
112 at early timepoints (Supplementary Fig. 1j,k). Quantification of IR-induced DSBs by  
113 neutral COMET assay revealed an equivalent DSB burden induced immediately after 5Gy  
114 IR, irrespective of p53 status (Fig. 1f,g). However, by 4 hours post-treatment, tail DNA  
115 percent was significantly reduced in the *TP53*<sup>-/-</sup> cells while remaining elevated in p53-  
116 proficient RPE1 (Fig. 1f,g). Thus, p53 deficiency is sufficient to induce radioresistance  
117 and accelerated DSB repair in an isogenic model.

### 118 **Inhibition of DNA-PK restores DNA damage foci formation in p53-deficient cells**

119 To directly assess the relationship between DSB repair kinetics, cell cycle status,  
120 and cell fate at the single cell level, we established a live cell imaging platform (Fig. 2a).  
121 RPE1 cells were dually labeled with PCNA-mCherry (to monitor cell cycle state  
122 transitions) and 53BP1-mVenus (to monitor DSB foci kinetics) (Fig. 2b)<sup>23,24</sup>. These dual  
123 labeled cells were treated with scrambled siRNA (si-Control) or siRNA targeting *TP53*  
124 (si-*TP53*), the latter of which resulted in >90% knockdown of *TP53* transcript and  
125 elimination of p53-dependent *CDKN1A* transcription in response to IR (Fig. 2c). 48 hours

126 after siRNA treatment, RPE1 cells were imaged for a total of 72 hours every 10 minutes,  
127 and 18 hours into imaging, the DSB inducing agent was added (Fig. 2a). To minimize  
128 time from radiation exposure to image capture and to induce equivalent DSBs in each  
129 population of cells, we utilized 100 ng/ml of Neocarzinostatin (NCS), a well-known radio-  
130 mimetic. NCS has been previously utilized in studies evaluating DNA DSB repair in  
131 conjunction with live-cell imaging and has been shown to induce peak DSBs within 10  
132 minutes of drug addition<sup>25,26</sup>. This experimental design allowed us to determine the cell  
133 cycle status of each cell within the asynchronous cell population at the time of NCS  
134 exposure. After NCS treatment, single-cell analyses for DSB repair foci kinetics and cell  
135 cycle outcomes were performed. As anticipated from Fig. 1b,c, analysis of global  
136 proliferation by live-cell imaging revealed significantly greater proliferation of p53-deficient  
137 RPE1 cells relative to controls after NCS treatment (Supplementary Fig. 2a,b).

138 To analyze DSB repair kinetics in cells exposed to NCS, we tracked and quantified  
139 53BP1 foci in single cells and plotted heatmaps of damage foci burden over time from  
140 cell birth to mitosis (Fig. 2d). Our results indicate that cells with functional p53 sustain  
141 high levels of damage foci in a prolonged manner after NCS exposure. In contrast, p53-  
142 deficient cells developed a lower peak burden of 53BP1 foci after NCS treatment, with  
143 accelerated resolution of damage foci to baseline levels (Fig. 2d,f). Given the rapidity with  
144 which 53BP1 foci were being resolved, we hypothesized that hyperactive NHEJ may be  
145 contributing. We thus performed the same experiment in the presence of an inhibitor of  
146 DNA-dependent Protein Kinase (DNA-PKi, NU7441 0.5 $\mu$ M), which targets the central  
147 kinase in the NHEJ pathway<sup>27-29</sup>. Strikingly, DNA-PKi qualitatively abolished the  
148 difference in 53BP1 kinetics after NCS treatment between p53-deficient and proficient

149 cells (Fig. 2e). To quantitatively assess the magnitude in damage burden, we calculated  
150 peak maximum 53BP1 foci values for each cell represented in the heatmap (Fig. 2f).  
151 Consistent with the heatmap representation, the median peak foci count after NCS  
152 treatment was 40% lower in si-*TP53* treated cells relative to controls (Fig. 2f,  $p < 0.0001$ ).  
153 Notably, DNA-PKi treatment resulted in a >2-fold increase in peak 53BP1 foci levels in  
154 the p53-deficient cells, whereas there was no comparable effect in control cells (Fig. 2f).  
155 These results indicate that DNA-PK activity is required for accelerated resolution of  
156 clastogen-induced DNA damage foci in p53-deficient cells.

157       Following this analysis, we studied the effects of DNA-PKi in different phases of  
158 the cell cycle during drug exposure. We used PCNA live-cell imaging to resolve cell cycle  
159 phase transitions in cells tracked for 53BP1 foci kinetics. We performed area under the  
160 curve (AUC) analyses in single cells to estimate total DNA damage burden during G1 and  
161 S phase after NCS exposure (Fig. 2g). This analysis revealed that the diminished 53BP1  
162 foci burden observed in p53-deficient cells was most pronounced during S phase relative  
163 to control cells (Fig. 2g). DNA-PKi treatment significantly increased S phase 53BP1  
164 burden in both si-Control and si-*TP53* treated RPE1 cells (Fig. 2g). While si-*TP53* treated  
165 cells in G1 were also affected to a lesser degree, we were curious to examine if the effect  
166 was in part due to loss of the p53-dependent G1/S checkpoint resulting in propagation of  
167 unrepaired DNA damage into S phase. Indeed, we found that DNA-PKi induced a drastic  
168 increase in 53BP1 foci as p53-deficient cells transitioned from G1 to S phase, which  
169 subsequently diminished over time (Fig. 2h,  $p < 0.00001$  at  $t = \text{start of S phase}$ ). Thus,  
170 DNA-PK is required for hyperactive resolution of clastogen-induced DSB foci in p53-  
171 deficient cells, and most prominently during S phase.

172 **Checkpoint responses halt p53-proficient cells upon exposure to NCS while p53-**  
173 **deficient cells continue to cell cycle despite NCS exposure**

174 To investigate the association between DNA damage and activation of cell cycle  
175 checkpoints, we quantified cell cycle phase durations for all treatment conditions (Fig.  
176 3a,b). p53-proficient G1 cells exposed to NCS induced a significant prolongation of G1,  
177 indicative of G1/S checkpoint activation, with a substantial proportion of cells remaining  
178 arrested for the duration of imaging (Fig. 3c and Supplementary Fig. 3a-c). Similarly, cells  
179 exposed to NCS in S phase exhibited a G2-M checkpoint (Fig. 3d). p53-deficient cells  
180 exhibited no prolongation of G1 duration after NCS, consistent with the notion that G1/S  
181 checkpoint activation is p53-dependent (Fig. 3e)<sup>30,31</sup>. DNA-PK inhibition did not alter G1  
182 duration in either p53-proficient or p53-deficient cells (Fig. 3c,e). In contrast, DNA-PKi  
183 increased the duration of G2-M checkpoints irrespective of p53 status (Fig. 3d,f). These  
184 observations suggest that increased levels of S phase DNA damage induced by DNA-  
185 PKi and NCS treatment (see Fig. 2g,h) result in activation of a G2/M checkpoint that is,  
186 at least partially, p53-independent. However, the duration of G2/M checkpoint activation  
187 differed by p53 status. While p53-proficient cells frequently remained arrested for the  
188 entire duration of imaging (open circles, Fig. 3c,d), p53-deficient cells experienced a more  
189 transient prolongation of G2 duration followed by progression into mitosis (Fig. 3e,f).

190 **Inhibition of DNA-PK induces catastrophic mitoses in p53-deficient cells**

191 We next used a heatmap representation to track the fate of individual cells from  
192 birth until mitosis (Fig. 4a,b, top panels). Red bars indicate a mitotic catastrophe or  
193 apoptosis event (Supplementary Fig. 4a,b). The median cell cycle time for both untreated  
194 p53-proficient and p53-deficient cells was approximately 22-24 hours. NCS treatment is

195 indicated as a dashed line at the 18 hour timepoint. Individual cells are ordered according  
196 to cell cycle phase at the time of NCS treatment (G1 versus S) and eventual cell fate  
197 (viable, G1 arrest, G2 arrest, or mitotic catastrophe/apoptosis). The majority (70%) of p53-  
198 proficient (si-Control) G1 cells exposed to NCS activated a G1 checkpoint that was  
199 maintained for the remainder of imaging (Fig. 4a). 26% of these cells underwent G2 arrest  
200 or mitotic catastrophe, whereas only 3% retained their proliferative capacity (Fig. 4a).  
201 Control cells exposed to NCS in S phase exhibited more diverse cell fates: 40% G2 arrest,  
202 17% mitotic catastrophe, and 43% that retained proliferative capacity. These  
203 observations, made using single-cell tracking of asynchronous cell populations, are  
204 consistent with observations of intrinsic radioresistance of S phase cells using cell  
205 synchronization methods<sup>32</sup>. In contrast, the majority of p53-deficient (i.e., si-TP53  
206 treated) cells in G1 or S at the time of NCS treatment remained viable without perceptible  
207 engagement of any cell cycle checkpoints (Fig. 4b, 80% and 87%, respectively).  
208 Consistent with prior 53BP1 analyses, S phase cells are most sensitized to DNA-PKi as  
209 the addition of the inhibitor increased G2 arrest frequency in control cells (40% to 91%),  
210 and increased mitotic catastrophe in p53-deficient cells (13% to 47%, Fig. 4a,b). In total,  
211 the percentage of viable p53-deficient cells after NCS decreased from 87% to 47% when  
212 treated in S phase with DNA-PK inhibition ( $p < 0.0001$ , Fisher's exact test).

213 Despite the significant increase in mitotic catastrophe induced by combined  
214 treatment with DNA-PKi and NCS, 47% of p53-deficient cells exhibit intrinsic resistance  
215 to therapy with retained proliferative viability (Fig. 4b). We hypothesized that levels of  
216 unrepaired DNA damage may be determinants of viable (i.e., resistant) versus non-viable  
217 (i.e., sensitive) cell fates. To evaluate this hypothesis, we quantified integral DNA damage

218 burden in p53-deficient RPE1 with viable versus non-viable mitotic outcomes (Fig. 4c and  
219 Supplementary Fig. 4c). The mean integral DNA damage burden was approximately 2-  
220 fold higher in non-viable cells, relative to cells that viably completed mitosis ( $p < 0.0001$ ).  
221 Further analysis revealed that integral DNA damage burden in S phase was most highly  
222 associated with cell viability after drug treatment (Supplementary Fig. 4c). In addition, we  
223 traced the average 53BP1 foci burden over time for these two cohorts (Fig. 4d). Our  
224 results indicate that cells with non-viable mitotic outcomes have an increased peak value  
225 of DNA damage after treatment with DNA-PKi and NCS, which remains elevated over  
226 time ( $p < 0.0001$  at  $t = 20$  hrs, Fig. 4d). Conversely, these findings indicate that p53-  
227 deficient cells that exhibit intrinsic therapeutic resistance may be utilizing compensatory  
228 DSB repair pathways to counteract the effects of NCS and DNA-PKi prior to mitotic entry.

### 229 **p53-deficient cells utilize alternative end-joining pathways in the absence of active** 230 **DNA-PK**

231 Prior studies have demonstrated that cells with NHEJ deficiency exhibit a  
232 compensatory increase in alternative end-joining repair mediated by DNA polymerase  
233 theta (Pol  $\theta$ , gene *POLQ*)<sup>4,33,34</sup>. Polymerase theta dependent end joining (TMEJ) of DNA  
234 DSBs is characterized by deletions and templated insertions that are flanked by short  
235 tracts of sequence identity, or microhomology (MH)<sup>4</sup>. We found that *POLQ* expression  
236 was 10- to 20-fold higher in two independent *TP53*<sup>-/-</sup> RPE1 clones, relative to parental  
237 *TP53* wild-type cells (Fig. 5a). *POLQ* is also overexpressed in TCGA breast, lung,  
238 bladder, colorectal, gastric, glioblastoma, pancreatic, prostate, melanoma, and uterine  
239 cancers with *TP53* mutation, relative to their *TP53* wild-type counterparts (Fig. 5b).

240 To assess whether hyperactive TMEJ contributes to therapeutic resistance of  
241 *TP53*<sup>-/-</sup> RPE1 cells to NCS and DNA-PKi, we sought to inhibit Pol  $\theta$ . As pharmacological  
242 inhibitors of Pol  $\theta$  are not yet commercially available, we created a double knockout  
243 *POLQ*<sup>-/-</sup>*TP53*<sup>-/-</sup> RPE1 line (Supplementary Fig. 5a). Bi-allelic frameshift mutations in  
244 *POLQ* were confirmed by Sanger sequencing and functional deficiency was established  
245 using an extrachromosomal TMEJ repair assay (Supplementary Fig. 5b-d)<sup>4</sup>.

246 To directly assess whether TMEJ repair is increased after DNA-PKi treatment, we  
247 analyzed chromosomal break repair patterns at a site-specific DSB in p53-deficient RPE1  
248 cells. Cells were transfected with Cas9 ribonucleoprotein (RNP) complexes that target  
249 the *LBR* locus, with or without DNA-PKi<sup>35</sup>. Genomic DNA was harvested 60 hours later  
250 and analyzed for break repair patterns using next generation sequencing (NGS) (Fig. 5c).  
251 Target amplification and TIDE analyses confirmed high rates of target site cleavage in all  
252 samples transfected with a full complement of Cas9-RNP (Supplementary Fig. 5e,f)<sup>36</sup>.  
253 We applied a bioinformatic algorithm (ScarMapper, see methods) to characterize the  
254 spectrum of repair products with at least 0.1% prevalence, classified according to the size  
255 of left deletion (LD), right deletion (RD), insertion (Ins), and microhomology (MH)  
256 (ScarMapper Methods). Indels <5bp were categorized as NHEJ, with the predominant  
257 repair product being a +A 1bp insertion<sup>35</sup>. TMEJ was defined as repair products whose  
258 frequency was diminished by at least 2-fold in *POLQ*<sup>-/-</sup> cells. All other repair products  
259 were categorized as “Unclassified.” DNA-PK inhibition in *TP53*<sup>-/-</sup> RPE1 cells results in a  
260 substantial reduction in NHEJ repair, with a compensatory increase in TMEJ to nearly  
261 45% of all DSB repair (Fig. 5d,e). In contrast, DNA-PK inhibition in *POLQ*<sup>-/-</sup>*TP53*<sup>-/-</sup> RPE1  
262 cells did not result in a substantial increase TMEJ signature repair (Fig. 5f,g). However,



263 a higher proportion of Unclassified repair products were detected (Fig. 5f,g). A limitation  
264 of NGS analysis of DSB break repair is that non-amplifiable target loci are not measured.  
265 Thus, we used digital PCR to quantify the *LBR* locus detection rate, relative to a control  
266 locus, upon inhibition of DNA-PK and/or Pol  $\theta$  (Supplementary Fig. 5g,h). *LBR* locus  
267 detection rates were most reduced upon inhibition of DNA-PK and Pol  $\theta$ , consistent with  
268 overall inhibition of DSB repair (Supplementary Fig. 5h). These observations confirm an  
269 essential role for TMEJ in compensatory repair of chromosomal DSBs upon  
270 pharmacologic inhibition of DNA-PK.

271 To determine the impact of *POLQ* inhibition on cellular viability, we performed  
272 clonogenic survival assays in the parental *TP53*<sup>-/-</sup> and *POLQ*<sup>-/-</sup>*TP53*<sup>-/-</sup> RPE1 lines treated  
273 with NCS with or without DNA-PKi. Genetic deficiency in *POLQ* resulted in significantly  
274 reduced viability after NCS treatment, particularly in combination with DNA-PKi (Fig. 5h).  
275 *TP53*<sup>-/-</sup> RPE1 cells with inhibition of both TMEJ and NHEJ repair pathways had  
276 comparable clonogenic survival to p53-proficient RPE1 cells (see Supplementary Fig.  
277 1e). Collectively, these findings indicate that hyperactive end joining repair via NHEJ and  
278 TMEJ mediate resistance to DNA damaging therapy induced by p53 deficiency (Fig. 5i).

## 279 **Discussion**

280 These results recognize enhanced DNA end joining repair capacity as a novel  
281 component of therapeutic resistance induced by p53 deficiency, and that loss of functional  
282 p53 alone is sufficient to increase hyperactive repair. Our findings indicate that DSB end  
283 joining hyperactivity is particularly relevant for suppressing S phase DNA damage burden,  
284 which we find is a key determinant of mitotic catastrophe (Fig. 5i). Although NHEJ is  
285 conventionally considered to be most critical for repair in G1, we observed a relatively



286 greater impact of DNA-PK inhibition on the fate of S phase cells after treatment with a  
287 radiomimetic. There are several potential explanations for this unanticipated observation.  
288 First, recent findings suggest that DNA-PK may be dispensable for synapsis formation  
289 during NHEJ<sup>37</sup>. Accordingly, repair of “simple” DSBs in G1 phase may have a reduced  
290 reliance on DNA-PK, whereas repair of more “complex” DSBs in S phase may require  
291 DNA-PK, possibly in partnership with the nuclease Artemis<sup>38–40</sup>. Second, it is possible  
292 that DNA-PK inhibition may be more impactful in S phase due to trapping of Ku proteins  
293 at DSBs, which inhibits the activation of homologous recombination pathways<sup>41</sup>. Third,  
294 DNA-PK may be particularly important in early S phase, when sister chromatids are not  
295 broadly present. Notably, we observed a prominent peak of unrepaired DSBs just as  
296 p53-deficient cells transitioned from G1 to S phase. Our observation that DSB end joining  
297 hyperactivity in p53-deficient cells is highly sensitive to DNA-PK inhibition warrants further  
298 mechanistic investigation. Recently, CYREN (cell cycle regulator of NHEJ) has been  
299 proposed to be a cell-cycle phase specific inhibitor of the Ku70/80 heterodimer that is  
300 critical for restricting NHEJ to G1<sup>42</sup>. It is therefore possible that p53-deficiency may  
301 transcriptionally reprogram cell cycle-inhibitors of NHEJ to enable hyperactive repair,  
302 though that is beyond the scope of this study.

303 Regulatory mechanisms that confer TMEJ hyperactivity in cancer are not well  
304 understood, although transcriptional overexpression of *POLQ* has also been observed in  
305 breast and ovarian cancers with *BRCA1/BRCA2* deficiency or mutations in other genes  
306 that confer Pol  $\theta$  synthetic lethality<sup>33,43</sup>. Recent work investigating integrated pathway  
307 analysis of *TP53* deficiency noted *POLQ* to be frequently overexpressed in *TP53* pathway  
308 deficient cancers<sup>1</sup>. Our findings, in an isogenic p53-deficient cell line model, indicate that

309 this relationship may be causal. The mechanism for p53-dependent suppression of *POLQ*  
310 expression remains to be elucidated, and may entail the regulation of non-coding RNAs<sup>44</sup>.  
311 The use of TMEJ can also be explained by the potential creation of more complex DSBs  
312 upon NHEJ suppression that serve as poor substrates for homologous recombination  
313 (HR). Indeed, the molecular mechanisms of NHEJ and TMEJ hyperactivity induced by  
314 p53 deficiency warrant further investigation.

315         Radiotherapy and other forms of DNA damaging therapy are employed in the vast  
316 majority of cancer patients<sup>45</sup>. Resistance to DNA damaging therapy may thus explain the  
317 adverse clinical outcomes associated with *TP53* mutations in many different cancer  
318 types<sup>1</sup>. Our study supports the investigation of DNA-PK inhibitors administered in  
319 combination with DNA damaging therapy (including radiotherapy) in patients with p53-  
320 deficient cancers. Additionally, as inhibitors of Pol  $\theta$  are currently in development<sup>46</sup>, our  
321 study suggests that combined inhibition of both DNA-PK and Pol  $\theta$  represents a promising  
322 strategy to reverse the therapeutic DNA damage resistance in p53-deficient cancers.

323 **Materials and Methods**

324 Key Resources Table:

| REAGENT or RESOURCE                                                                                    | SOURCE                    | IDENTIFIER                     |
|--------------------------------------------------------------------------------------------------------|---------------------------|--------------------------------|
| <b>Antibodies</b>                                                                                      |                           |                                |
| F(ab)2-Goat anti-Rabbit IgG (H+L) Cross-Adsorbed Secondary Antibody, Alexa Fluor 633 (1:10,000 for IF) | Thermo Fisher Scientific  | Cat# A-21072, RRID:AB_2535733  |
| Chicken anti-Mouse IgG (H+L) Cross-Adsorbed Secondary Antibody, Alexa Fluor 488, (1:10,000 for IF)     | Thermo Fisher Scientific  | Cat# A-21200, RRID:AB_2535786  |
| Mouse Anti-beta-Actin Monoclonal Antibody, Unconjugated, Clone AC-15 (1:10,000 for WB)                 | Sigma-Aldrich             | Cat# A1978, RRID:AB_476692     |
| Rabbit Anti-53BP1 Polyclonal Antibody (1:500 for IF)                                                   | Bethyl                    | Cat# A300-272A, RRID:AB_185520 |
| Mouse Anti-p53 (1C12) mAb Antibody (1:1000 for WB)                                                     | Cell Signaling Technology | Cat# 2524, RRID:AB_331743      |
| Rabbit Anti-phosphorylated Histone H2AX ( $\gamma$ -H2AX) Polyclonal Antibody (1:500 for IF)           | Trevigen                  | Cat# 4418-APC-100              |
| <b>Chemicals, Peptides, and Recombinant Proteins</b>                                                   |                           |                                |
| Trypsin EDTA                                                                                           | Gibco                     | 25200-056                      |
| Polyethylenimine, Linear (MW 25,000)                                                                   | Polysciences              | 23966                          |
| Bovine Serum Albumin                                                                                   | Fisher Scientific         | BP9706-160                     |
| Corning® Cell-Tak™ and Tissue Adhesive                                                                 | Corning                   | 354240                         |
| RNAiMax                                                                                                | ThermoFisher              | 13778100                       |
| <b>Critical Commercial Assays</b>                                                                      |                           |                                |
| PlasmoTest                                                                                             | Invitrogen                | REP-PT1                        |

|                                                                           |                              |                                                               |
|---------------------------------------------------------------------------|------------------------------|---------------------------------------------------------------|
| RNAeasy Plus Mini Kit                                                     | Qiagen                       | 74136                                                         |
| Comet Assay Kit                                                           | Trevigen                     | 4250-050-K                                                    |
| Q5® Hot Start High-Fidelity 2X Master Mix                                 | NEB                          | M0494S                                                        |
| NEBuilder® HiFi DNA Assembly Master Mix                                   | NEB                          | E2621L                                                        |
| TOPO® TA Cloning® Kit for Sequencing                                      | Invitrogen                   | 450030                                                        |
| T4 DNA Ligase                                                             | NEB                          | M0202S                                                        |
| EdU-Click 594                                                             | baseclick                    | BCK-Edu594                                                    |
| NEON Electroporation Kit                                                  | ThermoFisher                 | MPK1025                                                       |
| Cas9 Protein and TracrRNA for Alt-R Electroporation                       | IDT                          | Cas9 (s.p. high fidelity)<br>#1081060<br>TracrRNA<br>#1072532 |
| <b>Experimental Models: Cell Lines</b>                                    |                              |                                                               |
| hTERT-RPE1-Tricolor Reporter (PCNA-mCherry, 53BP1-mVenus, H2B-mTurquoise) | Gift from Dr. Jeremy Purvis  | (See Citations)                                               |
| hTERT-RPE1                                                                | ATCC                         | ATCC® CRL-4000™                                               |
| hTERT-RPE1-TP53-/-                                                        | This paper                   |                                                               |
| hTERT-RPE1-TP53-/-POLQ-/-                                                 | This paper                   |                                                               |
| <b>Oligonucleotides (sgRNAs and Primers)</b>                              |                              |                                                               |
| sgLBR                                                                     | GCCGATGGTGAAGTGGTAA<br>G     | Synthesized at: IDT                                           |
| sgTP53_Exon2                                                              | TCGACGCTAGGATCTGACTG         | IDT                                                           |
| sgTP53_Dwnstream_Intron                                                   | GAAACTGTGAGTGGATCCAT         | IDT                                                           |
| sgPOLQ_1                                                                  | ACTACTCTCAGCTTGA             | IDT                                                           |
| sgPOLQ_2                                                                  | TCAGGAGCATTGCAGCAGAG         | IDT                                                           |
| LBR_Fwd                                                                   | AAATGGCTGTCTTTCCCAGT<br>AA   | EtonBio                                                       |
| LBR_Rev                                                                   | ACGCAGTGGCTAAATCATCC         | EtonBio                                                       |
| TP53 RTqPCR Primer Fwd                                                    | GAGGTTGGCTCTGACTGTAC<br>C    | EtonBio                                                       |
| TP53 RTqPCR Primer Rev                                                    | TCCGTCCCAGTAGATTACCA<br>C    | EtonBio                                                       |
| CDKN1A RTqPCR Primer Fwd                                                  | TCACTGTCTTGTACCCTTGT<br>GCTT | EtonBio                                                       |
| CDKN1A RTqPCR Primer Rev                                                  | AGAAATCTGTCATGCTGGTC<br>TGCC | EtonBio                                                       |

| ONTARGET plus Human TP53 Si-RNA SMARTPOOL                                                                                                                                                                                                                                                                                                                                                                                                                                                                                                                                                      | Horizon Discovery (previously Dharmacon)                  | L-003329-00-0010                      |                                                            |
|------------------------------------------------------------------------------------------------------------------------------------------------------------------------------------------------------------------------------------------------------------------------------------------------------------------------------------------------------------------------------------------------------------------------------------------------------------------------------------------------------------------------------------------------------------------------------------------------|-----------------------------------------------------------|---------------------------------------|------------------------------------------------------------|
| ONTARGET plus NON-TARGETTING control siRNAs SMARTPOOL                                                                                                                                                                                                                                                                                                                                                                                                                                                                                                                                          | Horizon Discovery (previously Dharmacon)                  | D-001810-10-05                        |                                                            |
| ESR1 Genomic Locus Fwd Primer                                                                                                                                                                                                                                                                                                                                                                                                                                                                                                                                                                  | ATCTGTACAGCATGAAGTGC AAGA                                 | EtonBio                               |                                                            |
| ESR1 Genomic Locus Rev Primer                                                                                                                                                                                                                                                                                                                                                                                                                                                                                                                                                                  | CTAGTGGGCGCATGTAGGC                                       | EtonBio                               |                                                            |
| ESR1 Genomic Locus Probe                                                                                                                                                                                                                                                                                                                                                                                                                                                                                                                                                                       | T+C+T +AT+G +A+CC TG (Locked nucleic acid probe with HEX) | IDT (LNA : Locked Nucleic Acid Probe) |                                                            |
| LBR Locus Probe                                                                                                                                                                                                                                                                                                                                                                                                                                                                                                                                                                                | TGAGATTGAATGTAGCCTTT CTGGCCCTAA (with FAM)                |                                       |                                                            |
| <b>LBR Nested Sequencing Primers</b>                                                                                                                                                                                                                                                                                                                                                                                                                                                                                                                                                           |                                                           |                                       |                                                            |
| <p>Purple -&gt; Binds genomic DNA<br/> Green -&gt; Phasing portion of primer<br/> chr1:225423928-225424162<br/> Size: 235 base pairs<br/> Forward Primer: 114 base pairs left of cut<br/> Reverse Primer: 123 base pairs right of cut<br/> Rcomp = reverse complimentary</p> <p><b>TCAATTCAAGCTCTGTTCCATC</b>TTTATACTTCACAGTGTAAGCTGGGAGGTGCTG<br/> TCGTGGCTCAGAATTTCTACTTCATAATAAAGTGAAGTCCCAGGCCATCGA<b>CCTCT</b><br/> <b>T</b>ACCAC<b>TT</b>CACCATCGGCAAATTTCTACTTGGCATTCTTCTATAATTAACCTGAATA<br/> GTTTTAAAGAAAAAATTTGAGTCAATACATACACATTTATGTATT<b>CGTCTTTTCCA</b><br/> <b>CAGGCTGA</b></p> |                                                           |                                       |                                                            |
| Primer Name                                                                                                                                                                                                                                                                                                                                                                                                                                                                                                                                                                                    | Orientation                                               | Location                              | Sequence                                                   |
| LBR2.1 F0                                                                                                                                                                                                                                                                                                                                                                                                                                                                                                                                                                                      | Forward                                                   | chr1:225423928-225423949              | CGACGCTCTTCCGATCT <b>TCAATTCAAGCTCTGTTCCATC</b>            |
| LBR2.1 F1                                                                                                                                                                                                                                                                                                                                                                                                                                                                                                                                                                                      | Forward                                                   | chr1:225423927-225423949              | CGACGCTCTTCCGATCT <b>T</b> <b>TCAATTCAAGCTCTGTTCCATC</b>   |
| LBR2.1 F2                                                                                                                                                                                                                                                                                                                                                                                                                                                                                                                                                                                      | Forward                                                   | chr1:225423927-225423949              | CGACGCTCTTCCGATCT <b>CT</b> <b>TCAATTCAAGCTCTGTTCCATC</b>  |
| LBR2.1 F3                                                                                                                                                                                                                                                                                                                                                                                                                                                                                                                                                                                      | Forward                                                   | chr1:225423927-225423949              | CGACGCTCTTCCGATCT <b>ACT</b> <b>TCAATTCAAGCTCTGTTCCATC</b> |

|              |         |                              |                                                                 |
|--------------|---------|------------------------------|-----------------------------------------------------------------|
| LBR2.1<br>F4 | Forward | chr1:22542392<br>7-225423949 | CGACGCTCTTCCGATCT <b>GACTTCAATTCA</b><br><b>AGCTCTGTTCCATC</b>  |
| LBR2.1<br>F5 | Forward | chr1:22542392<br>7-225423949 | CGACGCTCTTCCGATCT <b>AGACTTCAATTC</b><br><b>AAGCTCTGTTCCATC</b> |
| LBR2.1<br>R0 | Rcomp   | chr1:22542416<br>2-225424143 | CGTGTGCTCTTCCGATCT <b>TCAGCCTGTGG</b><br><b>AAAAAGACG</b>       |
| LBR2.1<br>R1 | Rcomp   | chr1:22542416<br>3-225424143 | CGTGTGCTCTTCCGATCT <b>ATCAGCCTGTG</b><br><b>GAAAAAGACG</b>      |
| LBR2.1<br>R2 | Rcomp   | chr1:22542416<br>4-225424143 | CGTGTGCTCTTCCGATCT <b>GATCAGCCTGT</b><br><b>GGAAAAAGACG</b>     |
| LBR2.1<br>R3 | Rcomp   | chr1:22542416<br>5-225424143 | CGTGTGCTCTTCCGATCT <b>TGATCAGCCTG</b><br><b>TGGAAAAAGACG</b>    |
| LBR2.1<br>R4 | Rcomp   | chr1:22542416<br>6-225424143 | CGTGTGCTCTTCCGATCT <b>CTGATCAGCCT</b><br><b>GTGGAAAAAGACG</b>   |
| LBR2.1<br>R5 | Rcomp   | chr1:22542416<br>7-225424143 | CGTGTGCTCTTCCGATCT <b>AC</b>                                    |

### Software and Algorithms

|                   |                                                                                                                                                                                                                                                  |                                                                                   |
|-------------------|--------------------------------------------------------------------------------------------------------------------------------------------------------------------------------------------------------------------------------------------------|-----------------------------------------------------------------------------------|
| Python ≥v3.5      | <i>G. van Rossum, Python tutorial, Technical Report CS-R9526, Centrum voor Wiskunde en Informatica (CWI), Amsterdam, May 1995</i>                                                                                                                | <a href="https://www.python.org/">https://www.python.org/</a>                     |
| Flow Jo           | <i>FlowJo™ Software (Mac) [proliferation assay analysis] Becton, Dickinson and Company; 2019.</i>                                                                                                                                                | <a href="https://www.flowjo.com/">https://www.flowjo.com/</a>                     |
| Graphpad Prism v8 | N.A.                                                                                                                                                                                                                                             | <a href="https://www.graphpad.com/">https://www.graphpad.com/</a>                 |
| Fiji              | <i>Schindelin, J.; Arganda-Carreras, I. &amp; Frise, E. et al. (2012), "Fiji: an open-source platform for biological-image analysis", Nature methods 9(7): 676-682, PMID 22743772, doi:10.1038/nmeth.2019 (on Google Scholar).</i>               | <a href="https://imagej.net/Fiji#Downloads">https://imagej.net/Fiji#Downloads</a> |
| CellProfiler      | <i>CellProfiler Program Citation: McQuin C, Goodman A, Chernyshev V, Kamentsky L, Cimini BA, Karhohs KW, Doan M, Ding L, Rafelski SM, Thirstrup D, Wiegreaebe W, Singh S, Becker T, Caicedo JC, Carpenter AE (2018). CellProfiler 3.0: Next-</i> | <a href="http://www.cellprofiler.org">www.cellprofiler.org</a>                    |

|                                   |                                                                                                                                                                                                                                                                                                                                                                                                                                                                                                                             |                                                                                                                                                                                   |
|-----------------------------------|-----------------------------------------------------------------------------------------------------------------------------------------------------------------------------------------------------------------------------------------------------------------------------------------------------------------------------------------------------------------------------------------------------------------------------------------------------------------------------------------------------------------------------|-----------------------------------------------------------------------------------------------------------------------------------------------------------------------------------|
|                                   | <p>generation image processing for biology. PloS Biol. 16(7):e2005970 / <a href="https://doi.org/10.1371/journal.plosbiol.1005970">doi</a>. PMID: 29969450 (Research article)</p> <p><i>Analyst Software Citation:</i><br/>Jones TR, Kang IH, Wheeler DB, Lindquist RA, Papallo A, Sabatini DM, Golland P, Carpenter AE (2008) CellProfiler Analyst: data exploration and analysis software for complex image-based screens. BMC Bioinformatics 9(1):482/doi: 10.1186/1471-2105-9-482. PMID: 19014601 PMCID: PMC2614436</p> |                                                                                                                                                                                   |
| NIS Elements AR software          |                                                                                                                                                                                                                                                                                                                                                                                                                                                                                                                             | <a href="https://www.nikon.com/products/microscope-solutions/lineup/img_soft/nis-elements/">https://www.nikon.com/products/microscope-solutions/lineup/img_soft/nis-elements/</a> |
| SnapGene software v4.3.4          | GSL Biotech                                                                                                                                                                                                                                                                                                                                                                                                                                                                                                                 | <a href="https://www.snapgene.com">https://www.snapgene.com</a>                                                                                                                   |
| Open Comet v1.3.1                 | BM Gyori, G Venkatachalam, PS Thiagarajan, D Hsu and MV Clement. "OpenComet: An automated tool for comet assay image analysis", Redox Biology, 2:457-465, 2014.                                                                                                                                                                                                                                                                                                                                                             | <a href="http://www.cometbio.org">http://www.cometbio.org</a>                                                                                                                     |
| ScarMapper                        |                                                                                                                                                                                                                                                                                                                                                                                                                                                                                                                             | <a href="https://github.com/pkMyt1/ScarMapper.git">https://github.com/pkMyt1/ScarMapper.git</a>                                                                                   |
| Additional Image Analysis Scripts | Code EV1 Supplementary and Code Availability (MATLAB scripts)                                                                                                                                                                                                                                                                                                                                                                                                                                                               | PMID: 30886052<br>PMID: 29102360                                                                                                                                                  |
| <b>Other</b>                      |                                                                                                                                                                                                                                                                                                                                                                                                                                                                                                                             |                                                                                                                                                                                   |
| Genes                             | <a href="http://www.Ensembl.org">www.Ensembl.org</a>                                                                                                                                                                                                                                                                                                                                                                                                                                                                        | Ensembl v91                                                                                                                                                                       |

325

326 **Cell Culture**

327 *WT (p53<sup>+/+</sup>), WT Fusion-Reporter (p53<sup>+/+</sup>:PCNA-mCherry, 53BP1-mVenus), (p53<sup>-/-</sup>, and*

328 *p53<sup>-/-</sup>Polq<sup>-/-</sup> cells are hTERT immortalized RPEs. Cells were maintained in Dulbecco's*

329 modified Eagle's medium (DMEM), with 10% Fetal Bovine Serum (Hyclone FBS) and  
330 2mM L-glutamine (ThermoFisher). All cells were maintained at 37 C in an atmosphere of  
331 5% CO<sub>2</sub>. Cells were routinely tested for mycoplasma contamination using Plasmotest  
332 (Invivogen).

### 333 ***Establishment of Stable Cell Lines***

334 For the TP53 and Polq mutant cell lines, we used the Alt-R-CRISPR-Cas9 system (IDT).  
335 We performed Neon transfection (Invitrogen) and followed the manufacturer's protocol  
336 with Alt-R HiFi Cas9 nuclease, crRNA and tracrRNA purchased from IDT. crRNA was  
337 designed using MIT CRISPR (<http://crispr.mit.edu>) to target Exon 2 of the TP53 gene for  
338 the p53 mutant cell line and the polymerase domain of the Polq gene for the Polq mutant  
339 cell line. Forty-eight hours after transfection, cells were seeded for single clone selection.  
340 For the p53 gene editing experiment, a homologous template with a stop codon and SCA-  
341 I site was provided for selection of gene edited cells. Restriction Enzyme screening, PCR  
342 screening, and Sanger sequencing confirmed gene targeting, post which we performed  
343 functional tests.

### 344 ***Immunofluorescence***

345 Cells were fixed with 3% Paraformaldehyde for 15 min at RT, followed by permeabilization  
346 with 0.25% TritonX-100 in PBS. Cells were subsequently processed for immunostaining  
347 experiments using the antibodies listed below. Nuclei were visualized by staining with  
348 DAPI. The primary antibodies used were:  $\gamma$ H2AX (1:500, Trevigen, 4418-APC-100), and  
349 53BP1 (1:500 for immunofluorescence, Bethyl, A300-272A). The secondary antibodies  
350 were: FITC Goat Anti-Mouse IgG (H + L) (1:500, Jackson ImmunoResearch, 115-095-  
351 003) and FITC Goat Anti Rabbit IgG (H + L) (1:500, Jackson ImmunoResearch, 111-095-



352 144). Images were acquired using the GE IN CELL 2200 high through-put imaging system  
353 at 40x magnification.

#### 354 ***siRNA Treatment***

355 WT Fusion-Reporter RPE cells were passaged twice after -80 thaw and plated on 12 well  
356 plates at a density of 100,000 cells/ well for siRNA treatment. Twenty-four hours post  
357 plating, cells were exposed to 10nM / well sip53 (SMART pool from Dharmacon), and  
358 siControl (Non-targetting SMART pool from Dharmacon), in OPTIMEM with RNA-iMAX  
359 (ThermoFisher) as a transfection reagent. As a no-treatment control, cells were exposed  
360 to RNA-iMAX and OPTIMEM without siRNA. 48 hours post transfection, cells were  
361 transferred onto 12 well Cell-Tak coated glass plates (Cellvis), at a concentration of  
362 50,000 cells/well for imaging. Prior to imaging and at the end of imaging, samples were  
363 taken for RT-qPCR analysis of p53 mRNA to confirm si-RNA knockdown.

#### 364 ***Mixed Competition Assay - Flow Cytometry***

365 mCherry labelled and unlabeled hTERT-RPE1 cell lines were plated on 96 well plates at  
366 a 50:50 ratio, and irradiated 2 hrs post plating at 0, 2, 4, or 6 Gy, and left to grow. At  
367 indicated timepoints cells were harvested by trypsinizing and quenching with PBS with  
368 5% BSA. Cells were fixed with 2% PFA and subsequently transferred to V-bottom plates  
369 (ThermoFisher, 249570). Cells were quantified by flow cytometry using the Intellicyt iQue  
370 at a volume of 100 ul / sample, collecting all events per well. For each condition, 6  
371 biological replicates.

#### 372 ***Time-Lapse Imaging Microscopy***

373 Cells stably expressing Proliferating Cell Nuclear Antigen (PCNA)-mCherry and Tumor  
374 Suppressor p53 Binding Protein 1 (53BP1) – mVenus were treated with si-RNA for 48

375 hours prior to imaging. PCNA-mCherry and 53BP1-mVenus fusion reporter is a gift from  
376 Dr. Jeremy Purvis and Hui Chao Xiao. Cells were plated on Cell-Tak (Corning) coated  
377 glass-bottom 12-well plates (Cellvis) with Phenol-free DMEM (Invitrogen) supplemented  
378 with 10% FBS, and L-glutamine. Twenty-four hours post plating, cells were image  
379 captured every 10 min for 72 h in the mCherry and mVenus fluorescence channels. 18  
380 hours into imaging, DNA PKi was added at a concentration of 0.5  $\mu$ M / well, and/or NCS  
381 at a concentration of 100ng/ mL/ well. We commenced imaging every 10 minutes in both  
382 channels for another 48 hours. Fluorescence images were obtained using a Nikon Ti  
383 Eclipse inverted microscope with a 40x objective and Nikon Perfect Focus (PFS) system  
384 to maintain focus during acquisition period. Cells were maintained at constant  
385 temperature (37 °C) and atmosphere (5% CO<sub>2</sub>). Nikon, NIS Elements AR software was  
386 utilized for image acquisition. Image analysis was performed on ImageJ – Fiji and Cell  
387 Profiler.

### 388 ***Colony Forming Assays***

389 Cells lines used in the assay are indicated in the figures. Cells were treated with NCS  
390 and/ or DNA-PKi for twenty-four hours, after which we performed a media change. For  
391 colony formation experiments with ionizing radiation, cells were plated for IR treatment  
392 with or without DNA-PKi, and inhibitor treatment was washed off after twenty-four hours.  
393 Cells were subsequently incubated for 10-12 days at 37 °C to allow colony formation.  
394 Colonies were stained by Coomassie blue and counted.

### 395 ***DNA Repair Assay***

396 Cell lines used in the assay are indicated in the figure.  $5 \times 10^5$  cells were transfected with  
397 sgLBR2 and TracrRNA complexed Cas9 protein at final concentrations of

398 sgRNA:tracrRNA duplex: 22 pmol and Cas9 : 18 pmol per reaction, with Neon transfection  
399 kit (Invitrogen) using 2 1350 V, 30 ms pulses in a 10  $\mu$ L chamber. 60 hours post  
400 transfection, cells were harvested for genomic DNA extraction (Nucleospin). Part of the  
401 gDNA was utilized for Sanger Sequencing and TIDE analysis post amplification of the  
402 genomic LBR2 locus. Remaining gDNA was amplified using NGS nested sequencing  
403 primers and sent for sequencing and/ or Digital PCR.

#### 404 ***Digital PCR***

405 Primers and 5' hydrolysis probes were designed to specifically detect the copies of *LBR*  
406 locus. *ESR1* locus was used as genomic control. Each reaction assay contained 10  $\mu$ L of  
407 2x dPCR Supermix for Probes (No dUTP), 0.9  $\mu$ mol/L of respective primers, 0.25  $\mu$ mol/L  
408 of respective probes, and 10 ng of DNA in a final volume of 20  $\mu$ L. Droplets were  
409 generated using automated droplet generator (Bio-Rad catalog #186-4101) following  
410 manufacturer's protocol. PCR parameters for *LBR* locus were 10 sec at 95  $^{\circ}$ C, then 40  
411 cycles of 94  $^{\circ}$ C for 30 sec, 60  $^{\circ}$ C for 30 sec, and 72 $^{\circ}$ C for 2 min followed by 98 $^{\circ}$ C for 10  
412 min with a ramping of 2  $^{\circ}$ C/sec at all steps. The PCR cycling parameters for *ESR1*  
413 genomic locus were 10 sec at 95  $^{\circ}$ C, then 40 cycles of 94  $^{\circ}$ C for 30 sec and 60  $^{\circ}$ C for 1  
414 min followed by 98 $^{\circ}$ C for 10 min with a ramping of 2  $^{\circ}$ C/sec at all steps. After PCR  
415 amplification, droplet reader (Bio-Rad QX200™ Droplet Reader Catalog #1864003) was  
416 used to measure the end-point fluorescence signal in droplets as per the manufacturer's  
417 protocol. The recorded data was subsequently analyzed with QuantaSoft software  
418 version 1.7.4.0917 (Bio-Rad). Each Taqman probe was evaluated for sensitivity and  
419 specificity.

#### 420 ***DNA Repair Assay***

421 Cell lines used in the assay are indicated in the figure.  $5 \times 10^5$  cells were transfected with  
422 sgLBR2 and TracrRNA complexed Cas9 protein at final concentrations of  
423 sgRNA:tracrRNA duplex: 22 pmol and Cas9 : 18 pmol per reaction, with Neon transfection  
424 kit (Invitrogen) using 2 1350 V, 30 ms pulses in a 10  $\mu$ L chamber. 60 hours post  
425 transfection, cells were harvested for genomic DNA extraction (Nucleospin). Part of the  
426 gDNA was utilized for Sanger Sequencing and TIDE analysis post amplification of the  
427 genomic LBR2 locus. For analysis of INDELS, 100 ng of gDNA was amplified using  
428 phased primers. These libraries were indexed with the Illumina unique dual combinatorial  
429 indices. Following pooling, 2 x 150 cycle sequencing was done on an Illumina iSeq™.  
430 INDELS were identified by comparing the target reference sequence to the resulting  
431 sequence reads in the FASTQ files via a 10-nucleotide sliding window using the  
432 ScarMapper program.

433

#### 434 **Acknowledgements**

435 We thank Kasia Kedziora, Samuel Wolff, and Juan Carvajal-Garcia for data acquisition  
436 and technical assistance. We are grateful to the Gupta and Purvis Lab members for  
437 helpful discussions. UNC Core labs (Microscopy Services Laboratory, Hooker Imaging  
438 Core, and Flow Cytometry Core Facility) used in this study are supported in part by P30  
439 CA016086 Cancer Center Core Support Grant to the UNC Lineberger Comprehensive  
440 Cancer Center. Funding support was provided by the NCI/NIH (CA222092), Dept of  
441 Defense (W81XWH-18-1-0047), and the University Cancer Research Fund. G.P.G. holds  
442 a Career Award for Medical Scientists from the Burroughs Wellcome Fund. R.J.K. is

443 supported by the Cancer Cell Biology T32 Training Program (2T32CA071341-21) and the  
444 UNC Medical Scientist Training Program (MSTP).

445

#### 446 **Author contributions**

447 R.J.K and G.P.G. designed and conceived experiments. G.P.G. supervised the study.  
448 R.J.K and H.C.X performed the live-cell imaging experiments. H.C.X. and J.E.P. provided  
449 critical reagents and image analysis guidance. R.J.K performed and implemented  
450 computational analyses for image processing. R.J.K. performed all additional  
451 experiments and data analyses with statistical review. V.R.R., A.R.S., S.J.S., W.F., A-  
452 S.W., and S.K. provided technical assistance on imaging acquisition, colony forming  
453 assays, and digital PCR. D.A.S. developed break site sequencing analysis platforms.  
454 R.J.K. and G.P.G. wrote the manuscript, with contributions from all authors. All authors  
455 read and accepted the manuscript.

456

#### 457 **Conflicts of interests**

458 The authors declare no competing interests that are pertinent to this study.

459

#### 460 **Correspondence**

461 Correspondence should be addressed to Gaorav P. Gupta: [gaorav\\_gupta@med.unc.edu](mailto:gaorav_gupta@med.unc.edu)

#### 462 **References**

- 463 1. Donehower, L. A. *et al.* Integrated Analysis of TP53 Gene and Pathway  
464 Alterations in The Cancer Genome Atlas. *Cell Rep.* **28**, 1370-1384.e5 (2019).
- 465 2. Lowe, S. W. *et al.* p53 status and the efficacy of cancer therapy in vivo. *Science*

- 466 (80-. ). **266**, 807–810 (1994).
- 467 3. Lee, J. M. & Bernstein, A. p53 Mutations increase resistance to ionizing radiation.  
468 *Proc. Natl. Acad. Sci. U. S. A.* **90**, 5742–5746 (1993).
- 469 4. Wyatt, D. W. *et al.* Essential Roles for Polymerase  $\theta$ -Mediated End Joining in the  
470 Repair of Chromosome Breaks. *Mol. Cell* **63**, 662–673 (2016).
- 471 5. Nigro, J., Baker, S., Preisinger, A., Nature, J. J.- & 1989, undefined. *Mutations in*  
472 *the p53 gene occur in diverse human tumour types.* Springer (1989).
- 473 6. Hafner, A., Bulyk, M. L., Jambhekar, A. & Lahav, G. The multiple mechanisms  
474 that regulate p53 activity and cell fate. *Nature Reviews Molecular Cell Biology* **20**,  
475 199–210 (2019).
- 476 7. Kasthuber, E. R. & Lowe, S. W. Leading Edge Putting p53 in Context. (2017).  
477 doi:10.1016/j.cell.2017.08.028
- 478 8. Young, K. H. *et al.* Structural profiles of TP53 gene mutations predict clinical  
479 outcome in diffuse large B-cell lymphoma: An international collaborative study.  
480 *Blood* **112**, 3088–3098 (2008).
- 481 9. Miller, L. D. *et al.* An expression signature for p53 status in human breast cancer  
482 predicts mutation status, transcriptional effects, and patient survival. *Proc. Natl.*  
483 *Acad. Sci. U. S. A.* **102**, 13550–13555 (2005).
- 484 10. Robles, A. I. & Harris, C. C. Clinical outcomes and correlates of TP53 mutations  
485 and cancer. *Cold Spring Harbor perspectives in biology* **2**, (2010).
- 486 11. Freed-Pastor, W. A. & Prives, C. Mutant p53: one name, many proteins.  
487 *genesdev.cshlp.org* doi:10.1101/gad.190678.112

- 488 12. Lee, M. K. *et al.* Cell-type, Dose, and Mutation-type Specificity Dictate Mutant p53  
489 Functions In Vivo. *Cancer Cell* **22**, 751–764 (2012).
- 490 13. Bykov, V. J. N. *et al.* Restoration of the tumor suppressor function to mutant p53  
491 by a low-molecular-weight compound. *Nat. Med.* **8**, 282–288 (2002).
- 492 14. Huang, S. *et al.* P53 modulates acquired resistance to EGFR inhibitors and  
493 radiation. *Cancer Res.* **71**, 7071–7079 (2011).
- 494 15. Aubrey, B. J., Kelly, G. L., Janic, A., Herold, M. J. & Strasser, A. How does p53  
495 induce apoptosis and how does this relate to p53-mediated tumour suppression?  
496 *Cell Death and Differentiation* **25**, 104–113 (2018).
- 497 16. Nardella, C., Clohessy, J. G., Alimonti, A. & Pandolfi, P. P. Pro-senescence  
498 therapy for cancer treatment. *Nature Reviews Cancer* **11**, 503–511 (2011).
- 499 17. Vitale, I., Galluzzi, L., Castedo, M. & Kroemer, G. Mitotic catastrophe: a  
500 mechanism for avoiding genomic instability. *Nat. Rev. Mol. Cell Biol.* **12**, 385–392  
501 (2011).
- 502 18. Williams, A. B. & Rn Schumacher, B. p53 in the DNA-Damage-Repair Process.  
503 *perspectivesinmedicine.cshlp.org* doi:10.1101/cshperspect.a026070
- 504 19. Reyes, J. *et al.* Fluctuations in p53 Signaling Allow Escape from Cell-Cycle Arrest.  
505 *Mol. Cell* **71**, 581-591.e5 (2018).
- 506 20. Zhang, X. P., Liu, F., Cheng, Z. & Wang, W. Cell fate decision mediated by p53  
507 pulses. *Proc. Natl. Acad. Sci. U. S. A.* **106**, 12245–12250 (2009).
- 508 21. Chang, H. H. Y., Pannunzio, N. R., Adachi, N. & Lieber, M. R. Non-homologous  
509 DNA end joining and alternative pathways to double-strand break repair. *Nature*

- 510            *Reviews Molecular Cell Biology* **18**, 495–506 (2017).
- 511    22.    Krenning, L., Feringa, F. M., Shaltiel, I. A., vandenBerg, J. & Medema, R. H.  
512            Transient activation of p53 in G2 phase is sufficient to induce senescence. *Mol.*  
513            *Cell* **55**, 59–72 (2014).
- 514    23.    Chao, H. X. *et al.* Evidence that the human cell cycle is a series of uncoupled,  
515            memoryless phases. *Mol. Syst. Biol.* **15**, (2019).
- 516    24.    Chao, H. X. *et al.* Orchestration of DNA Damage Checkpoint Dynamics across the  
517            Human Cell Cycle. *Cell Syst.* **5**, 445-459.e5 (2017).
- 518    25.    Chao, H. X. *et al.* Orchestration of DNA Damage Checkpoint Dynamics across the  
519            Human Cell Cycle. *Cell Syst.* **0**, (2017).
- 520    26.    Chao, H. X. *et al.* Evidence that the cell cycle is a series of uncoupled,  
521            memoryless phases. (2018). doi:10.1101/283614
- 522    27.    Blackford, A. N. & Jackson, S. P. Molecular Cell Review ATM, ATR, and DNA-PK:  
523            The Trinity at the Heart of the DNA Damage Response. (2017).  
524            doi:10.1016/j.molcel.2017.05.015
- 525    28.    Zhao, Y. *et al.* Preclinical evaluation of a potent novel DNA-dependent protein  
526            kinase inhibitor NU7441. *Cancer Res.* **66**, 5354–5362 (2006).
- 527    29.    Chan, D. W. *et al.* Autophosphorylation of the DNA-dependent protein kinase  
528            catalytic subunit is required for rejoining of DNA double-strand breaks. *Genes*  
529            *Dev.* **16**, 2333–2338 (2002).
- 530    30.    Attardi, L. D., De Vries, A. & Jacks, T. Activation of the p53-dependent G1  
531            checkpoint response in mouse embryo fibroblasts depends on the specific DNA



- 532 damage inducer. *Oncogene* **23**, 973–980 (2004).
- 533 31. Agarwal, M. L., Agarwal, A., Taylor, W. R. & Stark, G. R. p53 controls both the  
534 G2/M and the G1 cell cycle checkpoints and mediates reversible growth arrest in  
535 human fibroblasts. *Proc. Natl. Acad. Sci. U. S. A.* **92**, 8493–8497 (1995).
- 536 32. Pawlik, T. M. & Keyomarsi, K. Role of cell cycle in mediating sensitivity to  
537 radiotherapy. *Int. J. Radiat. Oncol.* **59**, 928–942 (2004).
- 538 33. Feng, W. *et al.* Genetic determinants of cellular addiction to DNA polymerase  
539 theta. *Nat. Commun.* **10**, 1–13 (2019).
- 540 34. Wood, R. D. & Doublé, S. DNA polymerase  $\theta$  (POLQ), double-strand break  
541 repair, and cancer. *DNA Repair* **44**, 22–32 (2016).
- 542 35. Brinkman, E. K. *et al.* Kinetics and Fidelity of the Repair of Cas9-Induced Double-  
543 Strand DNA Breaks Molecular Cell Article Kinetics and Fidelity of the Repair of  
544 Cas9-Induced Double-Strand DNA Breaks. *Mol. Cell* **70**, 801–813 (2018).
- 545 36. Brinkman, E. K., Chen, T., Amendola, M. & Van Steensel, B. Easy quantitative  
546 assessment of genome editing by sequence trace decomposition. *Nucleic Acids*  
547 *Res.* (2014). doi:10.1093/nar/gku936
- 548 37. Zhao, B. *et al.* The essential elements for the noncovalent association of two DNA  
549 ends during NHEJ synapsis. *Nat. Commun.* **10**, (2019).
- 550 38. Bétous, R. *et al.* DNA replication stress triggers Rapid DNA Replication Fork  
551 Breakage by Artemis and XPF. *PLoS Genet.* **14**, (2018).
- 552 39. Ma, Y., Pannicke, U., Schwarz, K. & Lieber, M. R. Hairpin opening and overhang  
553 processing by an Artemis/DNA-dependent protein kinase complex in

- 554 nonhomologous end joining and V(D)J recombination. *Cell* **108**, 781–794 (2002).
- 555 40. Löbrich, M. & Jeggo, P. A Process of Resection-Dependent Nonhomologous End  
556 Joining Involving the Goddess Artemis. *Trends in Biochemical Sciences* **42**, 690–  
557 701 (2017).
- 558 41. Zhou, Y. & Paull, T. T. DNA-dependent protein kinase regulates DNA end  
559 resection in concert with Mre11-Rad50-Nbs1 (MRN) and Ataxia Telangiectasia-  
560 mutated (ATM). *J. Biol. Chem.* **288**, 37112–37125 (2013).
- 561 42. Arnoult, N. *et al.* Regulation of DNA repair pathway choice in S and G2 phases by  
562 the NHEJ inhibitor CYREN. *Nature* **549**, 548–552 (2017).
- 563 43. Ceccaldi, R. *et al.* Homologous recombination-deficient tumors are hyper-  
564 dependent on POLQ-mediated repair. *Nature* **518**, 258–262 (2015).
- 565 44. Huarte, M. *et al.* A large intergenic noncoding RNA induced by p53 mediates  
566 global gene repression in the p53 response. *Cell* **142**, 409–419 (2010).
- 567 45. Baskar, R., Dai, J., Wenlong, N., Yeo, R. & Yeoh, K. W. Biological response of  
568 cancer cells to radiation treatment. *Frontiers in Molecular Biosciences* **1**, 24  
569 (2014).
- 570 46. Higgins, G. S. & Boulton, S. J. Beyond PARP-POL $\theta$  as an anticancer target.  
571 *Science* **359**, 1217–1218 (2018).

572

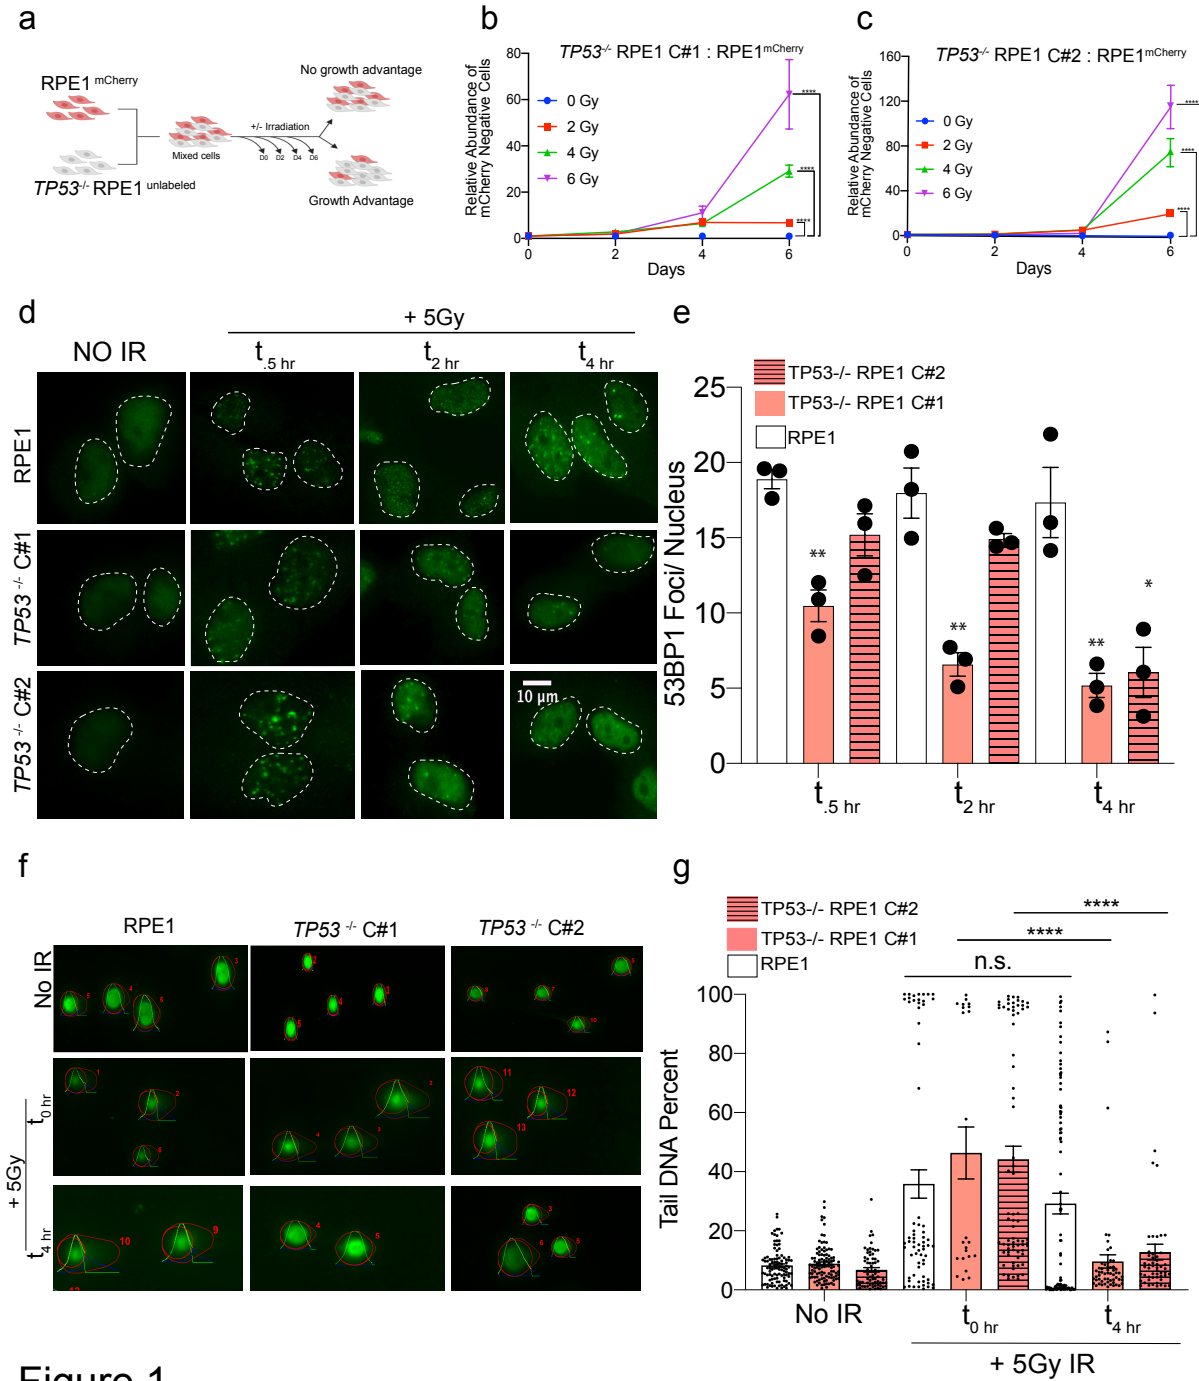

Figure 1

## Figure 1 | p53-deficient cells exhibit radioresistance and accelerated resolution of DNA DSBs.

**a**, Diagram of growth competition assay. mCherry-labelled RPE1 cells were mixed with unlabeled *TP53*<sup>-/-</sup> RPE1 (1:1), exposed to IR and grown for 6 days. **b**, Relative abundance of unlabeled *TP53*<sup>-/-</sup> Clone#1 measured by Intellicyte high-throughput cytometry  $\pm$  SEM (n=6) is shown, normalized to the untreated (0Gy) cohort at each time point. **c**, Relative abundance of unlabeled *TP53*<sup>-/-</sup> Clone#2  $\pm$  SEM (n=6) is shown, normalized to the untreated (0Gy) cohort at each time point. **d**, Representative immunofluorescence images of 53BP1 foci in cells with indicated genotypes untreated (no IR) or treated with IR (5Gy) and collected at .5, 2, and 4 h after irradiation. **e**, Quantification of 53BP1 foci. Data shown are mean (n=50 cells per treatment condition)  $\pm$  SEM (n=3), and are consistent across two independent biological replicates. \* $p < 0.05$ ; \*\* $p < 0.01$ ; by two-tailed Student's t-test. **f**, Representative Neutral COMET fluorescence staining for DNA tails in cells with indicated genotypes treated with or without 5Gy IR. For irradiated cells, 2 timepoints are shown: immediately after and 4 hours post IR. COMET tails and heads are denoted by OpenComet software analysis. **g**, Quantification of DNA DSBs via Neutral COMET assay reported as tail DNA percent at 0 and 4 hours post IR in RPE1 and two *TP53*<sup>-/-</sup> RPE1 cell lines. Data shown are mean (n= 50-150 cells per treatment condition)  $\pm$  SEM, and are consistent across three independent biological replicates. \* $p < 0.05$ ; \*\* $p < 0.01$ ; \*\*\*\* $p < 0.0001$  by two-tailed Student's t-test.

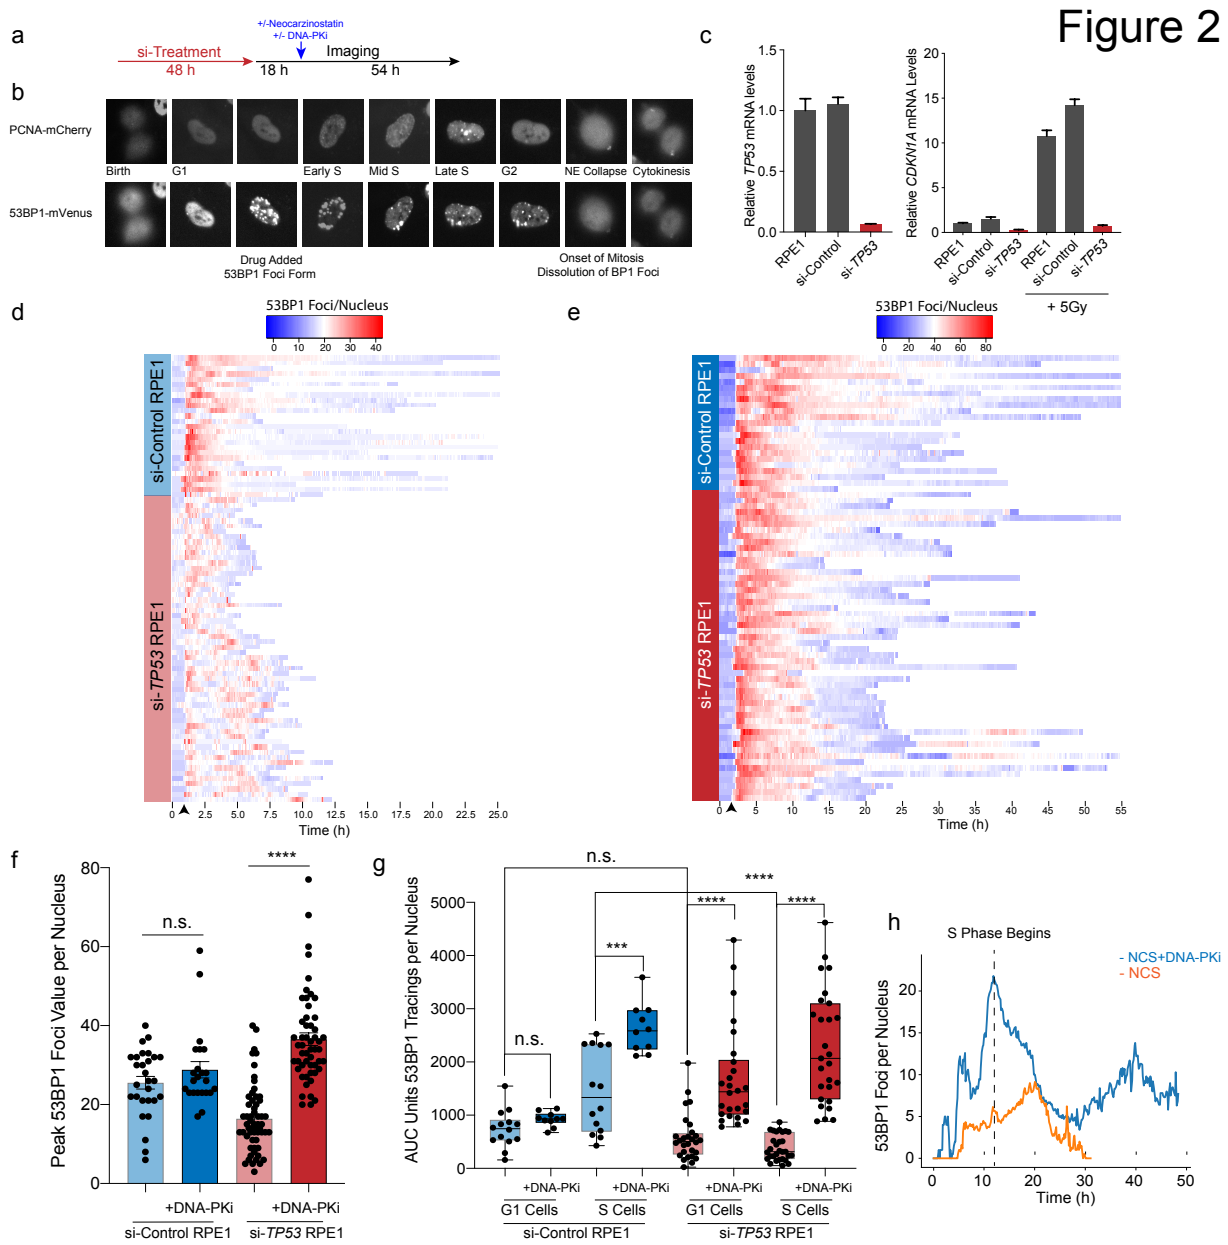

## Figure 2 | Inhibition of DNA-PK restores DNA damage foci formation in p53-deficient cells.

**a**, Live cell imaging procedure. Cells transfected with 10 nM si-control or si-*TP53* for 48 h prior to imaging. 18 h into imaging, cells are treated with NCS (100 nM), DNA-PKi (.5 uM) or both and imaged for 72 total hours. **b**, RPE1 cell expressing the PCNA-mCherry and 53BP1-mVenus reporters. Cell cycle phases delineated by PCNA foci and DNA DSBs are marked by 53BP1 foci. **c**, RT-qPCR for *TP53* mRNA levels (left) and *CDKN1A* mRNA levels (right) in si-control treated vs. si-*TP53* treated cells. To induce *CDKN1A* expression, cells irradiated at 5Gy and mRNA harvested 3 hrs post IR. **d**, Heatmap of 53BP1 foci tracings for single cells tracked from birth to mitosis or end of imaging. For si-control (n = 30 cells) and si-*TP53* treated RPE1 (n = 60 cells) treated with NCS 100 ng/ml. For visualization, cells are aligned to 10 frames prior to drug addition (black arrow). **e**, Heatmap of 53BP1 foci tracings for si-control (n = 25 cells) and si-*TP53* treated RPE1 cells (n = 55 cells) treated with 100 ng/ml NCS + 0.5 uM DNA-PKi. **f**, Peak 53BP1 foci counts for cells treated with 100 ng/ml NCS or NCS+0.5 uM DNA-PKi. Significance determined using two-tailed t-test. **g**, Area under the curve (AUC) analysis of 53BP1 burden showing integral DNA damage for cells treated with NCS vs. NCS and DNA-PKi. Cells are segregated into two groups: cells exposed to drug in G1 vs. S phase (n = 25-30 G1 or S cells for si-*TP53* cohort, n = 10-15 G1 or S cells for si-control cohort). Significance determined by two-tailed t-test. \*\*\*\* $p < 0.0001$ , \*\*\* $p < 0.001$ , n.s. = non-significant. **h**, 53BP1 foci burden in G1 vs. S phase p53-deficient RPE1 upon exposure to NCS and DNA-PKi. Dashed line = S phase onset, blue line = mean 53BP1 foci burden for all cells in G1 with NCS and DNA-PKi addition, orange line = mean foci value for cells in G1 with NCS treatment alone, (n = 30 cells for each condition).

Figure 3

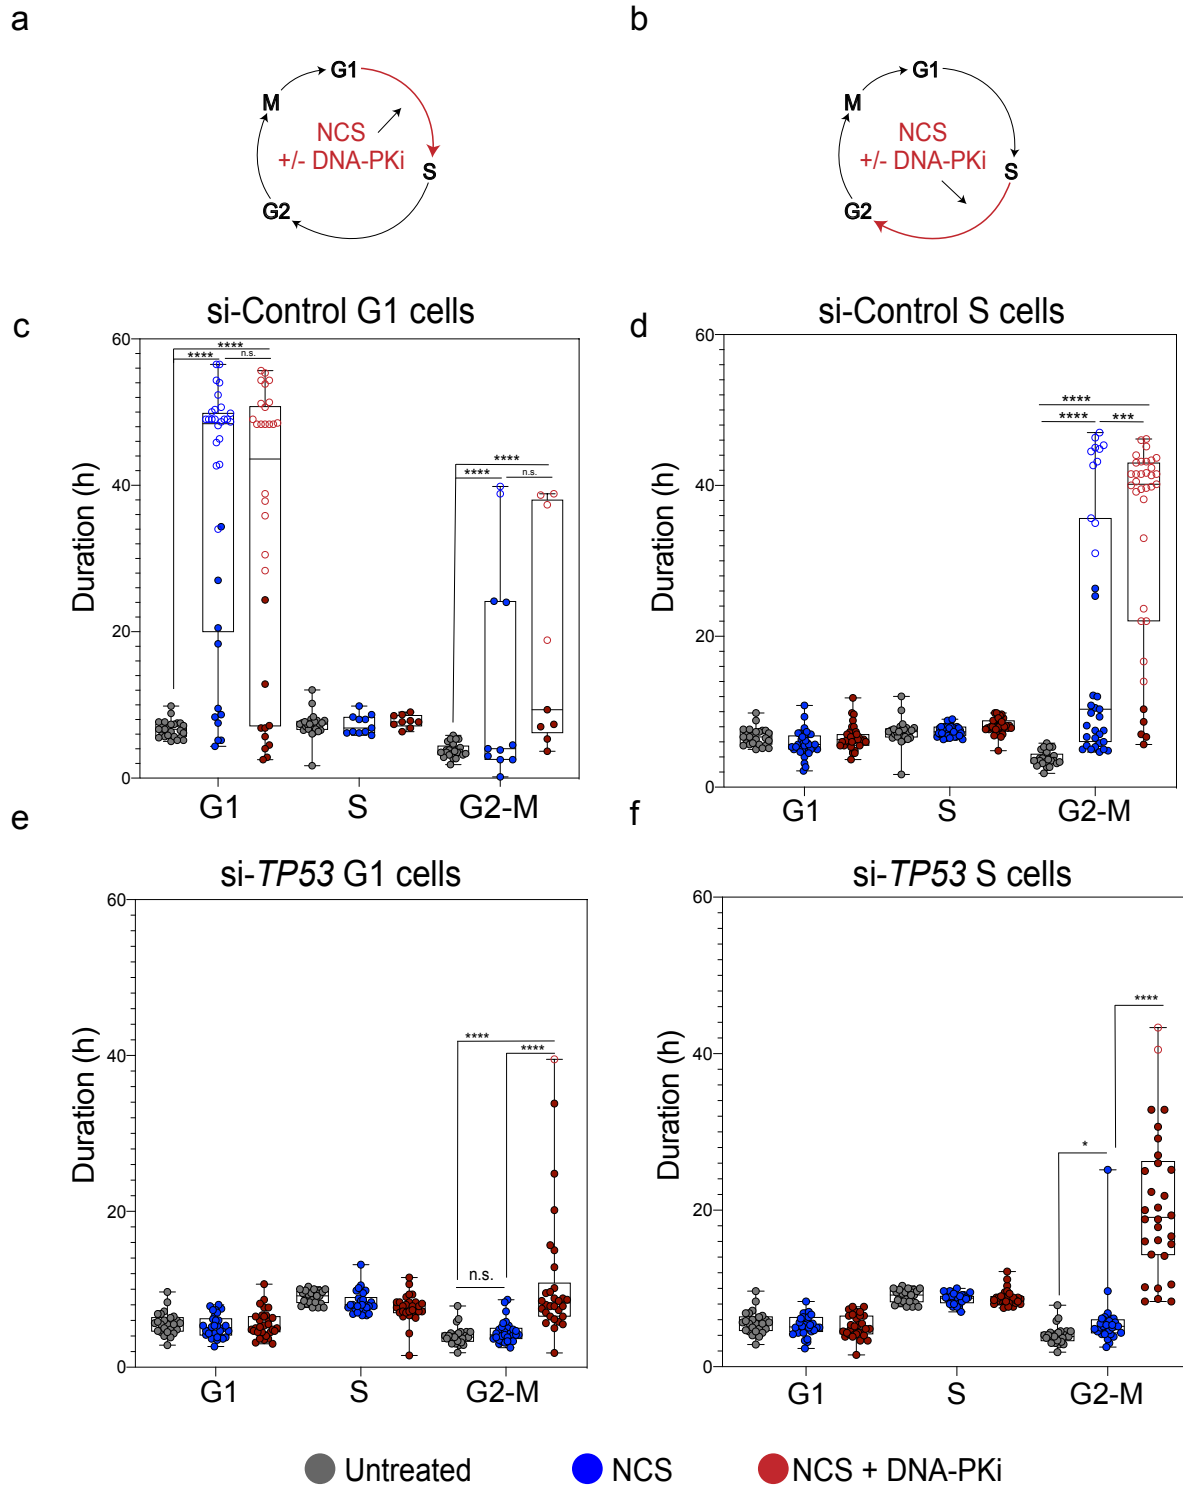

**Figure 3 | Checkpoint responses halt p53-proficient cells upon exposure to NCS while p53-deficient cells continue to cell cycle despite NCS exposure.**

**a**, Schematic depicting NCS treatment (50 ng/ml + 100 ng/ml for si-control and 100 ng/ml for si-*TP53* RPE1) and/or NCS + 0.5 uM DNA-PKi treatment, and phase of the cell cycle cells are exposed to drug (G1). **b**, Schematic of drug treatment for S phase cells. **c**, Distribution of cell cycle phase lengths, each colored dot is an individual cell with untreated cells (no NCS) shown in black, NCS treated cells shown in blue, and NCS+ 0.5uM DNA-PKi treated cells shown in red for si-control RPE1 in G1 phase.  $n = 20$  untreated and  $n = 30$  treated cells (for each treatment cohort). Statistical significance was determined by comparing untreated and treated groups at each phase. \*\*\*\* $p < 0.0001$ , n.s. = non-significant. Open circles indicate arrested cells that did not enter the subsequent phase of cell cycle for remainder of imaging. **d**, Distribution of cell cycle phase lengths for si-control treated RPE1 in S phase, \*\*\* $p < 0.001$ , \*\*\*\* $p < 0.0001$ , n.s. = non-significant as evaluated by two-tailed t-test. **e**, Distribution of cell cycle phase lengths for si-*TP53* treated RPE1 in G1 phase, \*\*\*\* $p < 0.0001$ , n.s. = non-significant as evaluated by two-tailed t-test. **f**, Distribution of cell cycle phase lengths for si-*TP53* treated RPE1 in S phase, \*\*\*\* $p < 0.0001$ , n.s. = non-significant as evaluated by two-tailed t-test.



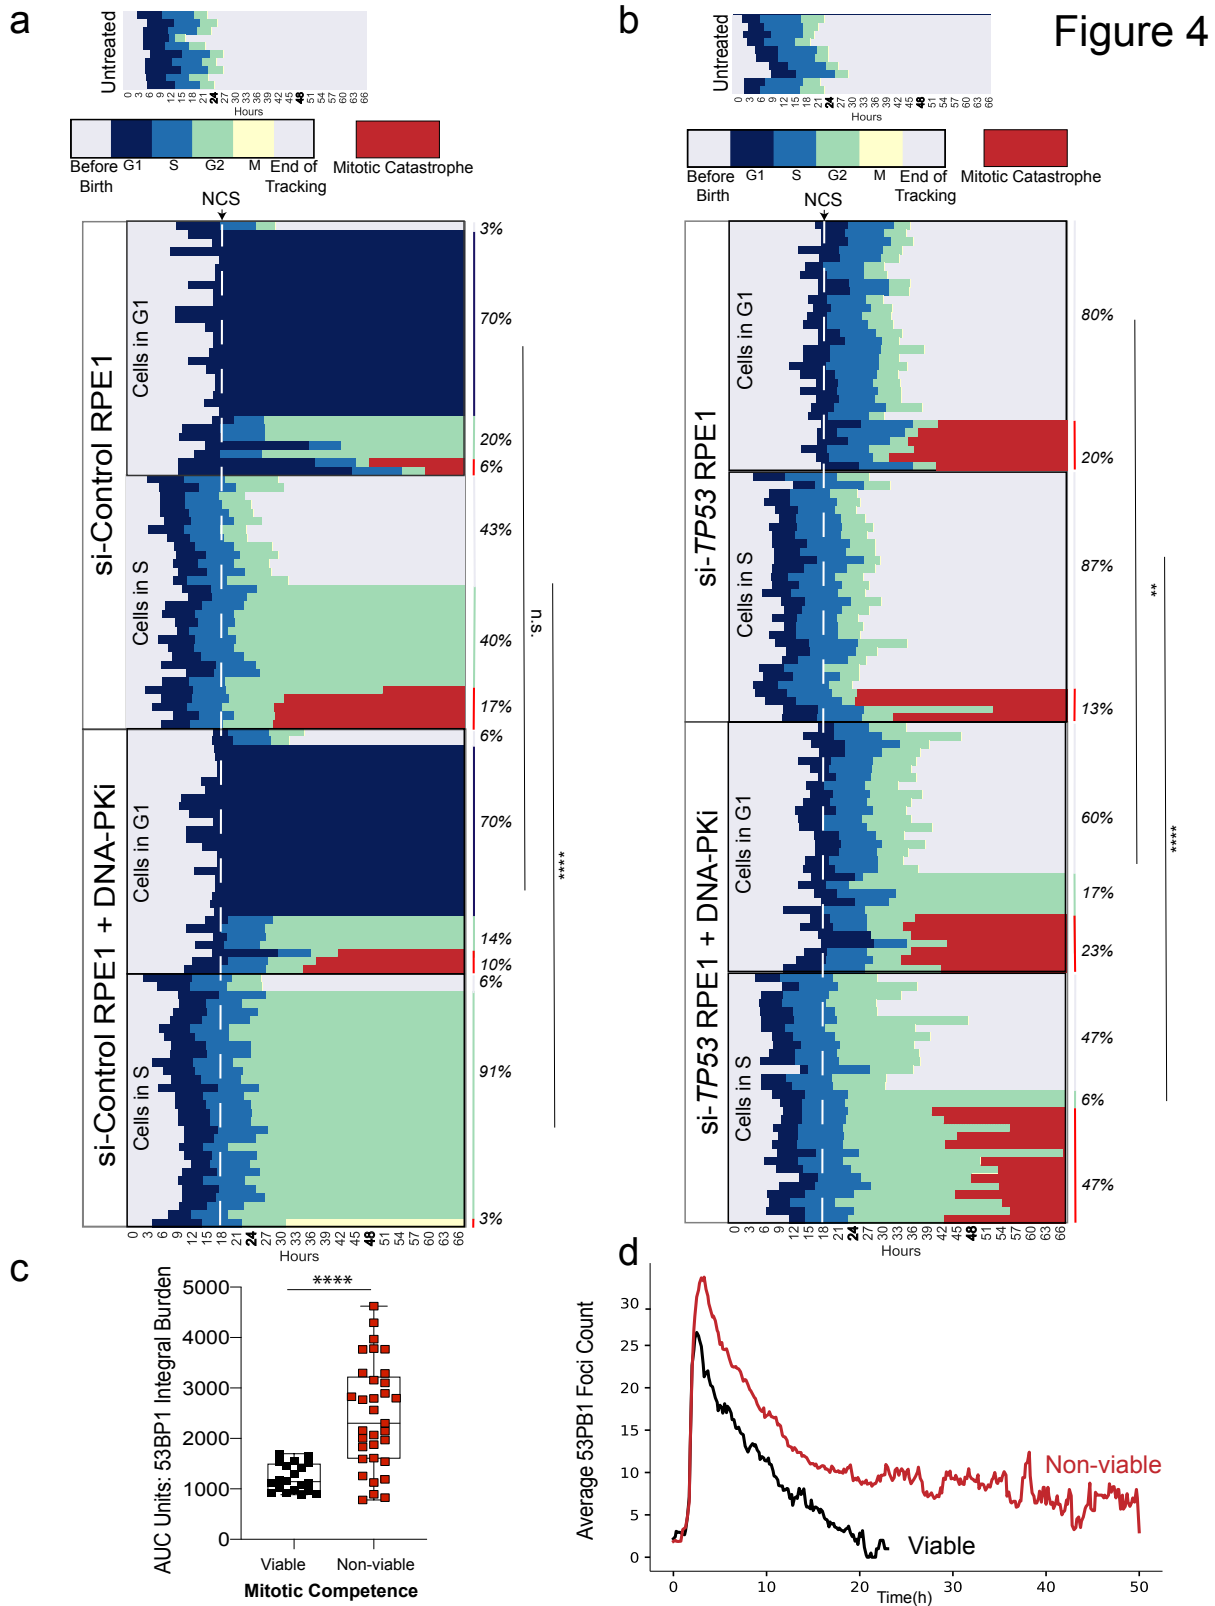

Figure 4

**Figure 4 | Inhibition of DNA-PK induces catastrophic mitoses in p53-deficient cells.**

**a**, Cell cycle outcome analyses for si-control treated RPE1, dashed white line indicates drug addition, each row is an individual cell (n = 60 cells for NCS and n=60 cells for NCS+DNA-PKi treatment). Colored bars indicate different phases of the cell cycle, legend shown with no treatment control for comparison. Cells with red bars at the end of mitosis indicate terminal cell cycle event (mitotic catastrophe or apoptosis). Event frequency is reported as a percentage on the right. Cells exposed in G1 vs. S cells are treated as separate cohorts. Fisher's exact test was performed between +/- DNA-PKi cohorts using 2 outcome groups (viable, vs. non-viable (arrested cells + terminal outcomes)). \*\*\*\* $p < 0.0001$ , n.s. =non-significant **b**, Cell cycle outcome analyses for si-*TP53* treated RPE1, dashed line indicates drug addition, each row is an individual cell (n = 60 cells for NCS and n=60 cells for NCS+DNA-PKi treatment). **c**, AUC analysis of 53BP1 damage burden in viable vs. non-viable p53-deficient cells that were treated with NCS and DNA-PKi. Statistical significance was calculated using a Mann-Whitney test comparing ranks. \*\*\*\* $p < 0.0001$  **d**, Dynamics of 53BP1 foci burden p53-deficient RPE1 segregated by mitotic viability. The red line corresponds to mean 53BP1 foci burden for all p53-deficient cells treated with NCS and DNA-PKi that undergo catastrophic mitoses, black line indicates mean foci value for p53-deficient cells with NCS and DNA-PKi treatment that are viable post mitosis, ( n = 20 viable cells and n = 33 non-viable cells).

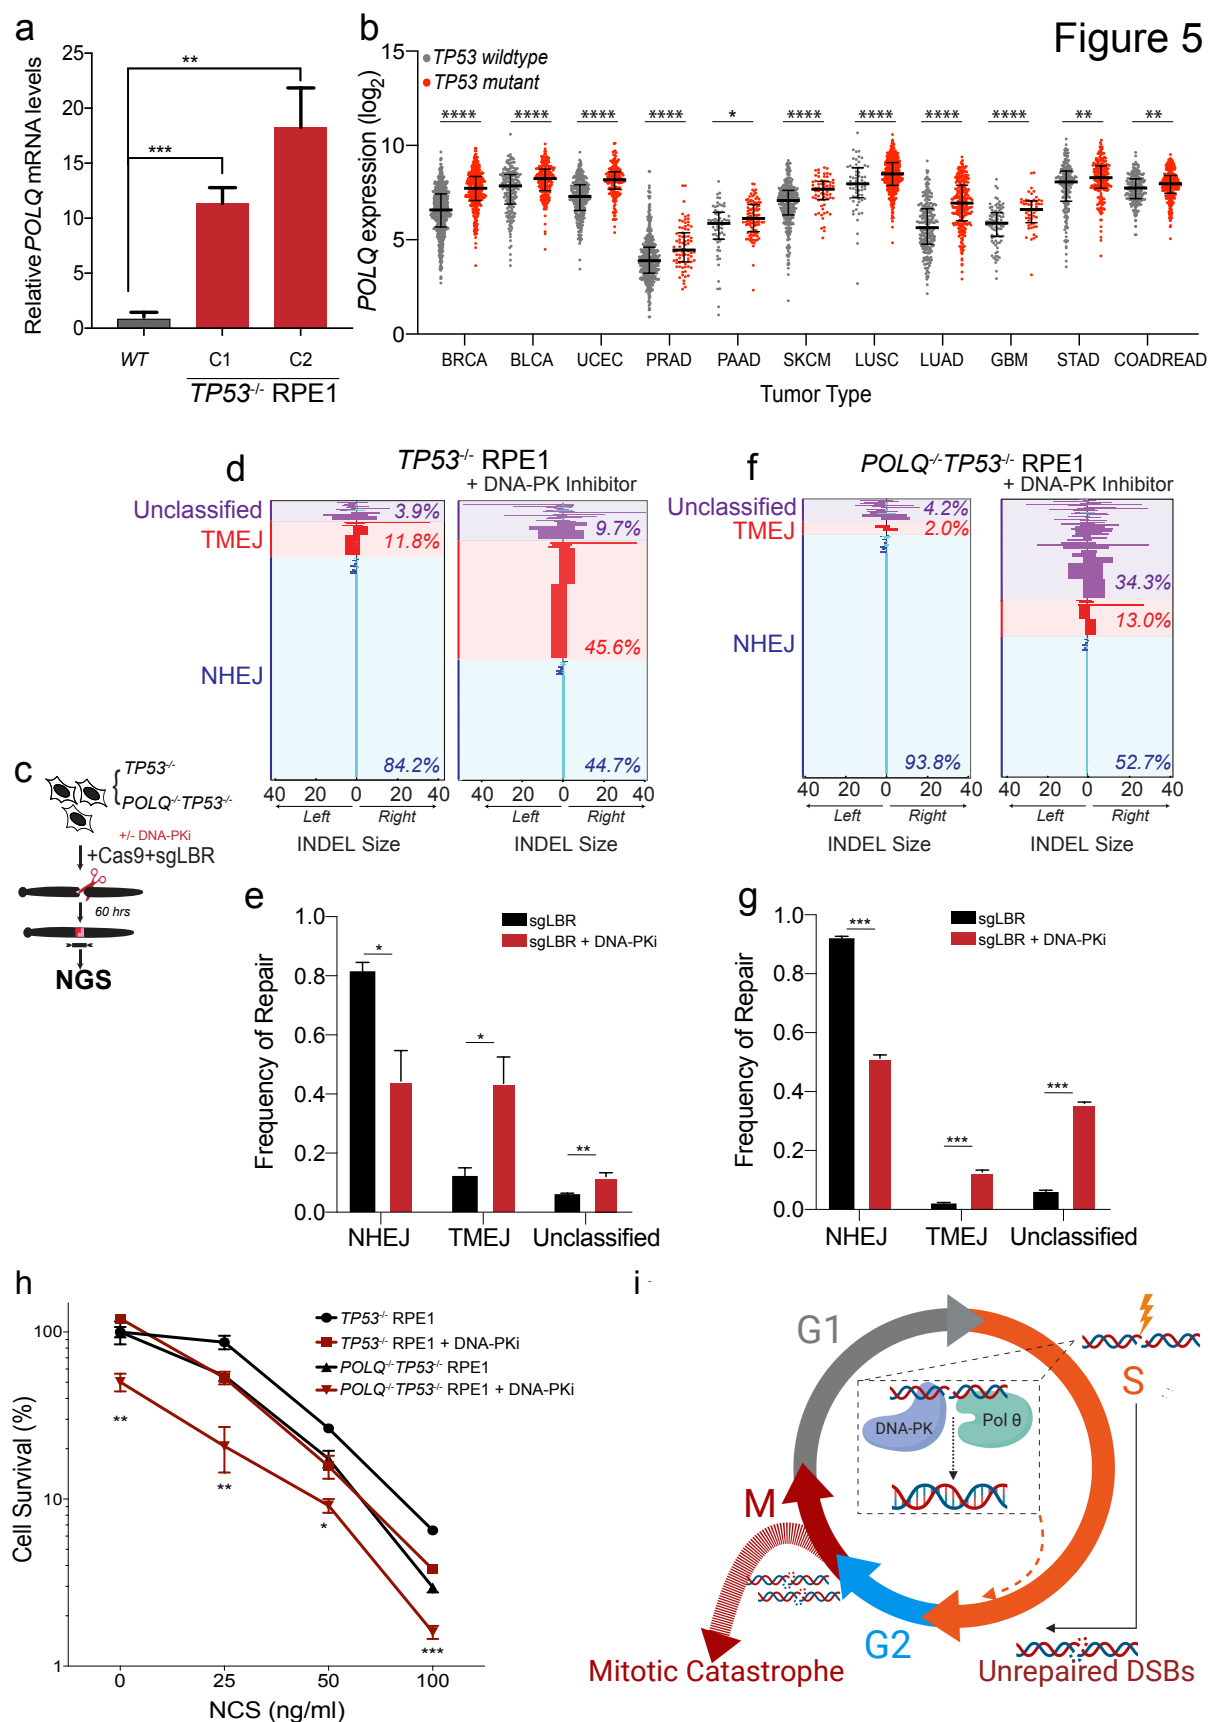

## Figure 5 | p53-deficient cells utilize alternative end-joining pathways in the absence of active DNA-PK

**a**, RT-qPCR for *POLQ* mRNA levels in 2 *TP53*<sup>-/-</sup>RPE1 clones compared to WT RPE1. Significance was determined using two-tailed t-test. \*\*\*\* $p < 0.0001$ , \*\* $p < 0.01$ . **b**, *POLQ* gene expression depicted as log<sub>2</sub> values of *TP53* wild-type vs. mutant cancers across a subset of TCGA tumor types. Tumor labels follow TCGA labeling format. BRCA: breast cancer, BLCA: B-cell lymphoma, UCEC: uterine cancer, PRAD: Prostate cancer, PAAD: pancreatic cancer, SKCM: melanoma, LUSC: lung squamous cell cancer, LUAD: lung adenocarcinoma, GBM: glioblastoma multiforme, STAD: stomach cancer, and COADREAD: colorectal cancer. \*\*\*\* $p < 0.0001$ , \*\*\* $p < 0.001$ , \*\* $p < 0.01$ , \* $p < 0.05$ , as calculated by one-way ANOVA. **c**, Schematic depicting chromosomal break repair assay. *TP53*<sup>-/-</sup>, and *POLQ*<sup>-/-</sup>*TP53*<sup>-/-</sup> RPE1 are segregated into 2 cohorts (+/- 3 uM DNA-PKi). Cells are electroporated using Cas9-RNP-sgRNA-*LBR* and evaluated by next generation sequencing for break repair products at target locus. **d**, Horizontal bar chart representation of individual break repair products at *LBR* locus in *TP53*<sup>-/-</sup> RPE1 by NGS. Position 0 denotes *LBR* locus cut site, with left and right positions denoting final INDEL size and orientation. Results are reported as average with SEM of n=3 independent biological replicates. **e**, Histogram of overall frequency of repair of NHEJ, TMEJ, and Unclassified products in *TP53*<sup>-/-</sup> RPE1 with or without DNA-PKi treatment. **f**, Horizontal bar chart representation of individual break repair products at *LBR* locus in *POLQ*<sup>-/-</sup>*TP53*<sup>-/-</sup> RPE1 by NGS. Position 0 denotes *LBR* locus cut site, with left and right positions denoting final INDEL size and orientation. Results are reported as average with SEM of n=3 independent biological replicates. **g**, Histogram of overall frequency of repair of NHEJ, TMEJ, and Unclassified products in *TP53*<sup>-/-</sup> RPE1 with or without DNA-PKi treatment. **h**, Colony forming efficiency assay evaluating *TP53*<sup>-/-</sup> and *POLQ*<sup>-/-</sup>*TP53*<sup>-/-</sup> RPE1 after treatment with NCS (at 25 ng/ml, 50 ng/ml, and 100 ng/ml) with or without .5 uM DNA-PKi, data shown are mean +/- SEM (n= 3). Statistical significance assessed with student's two-tail test. \*\*\* $p < 0.001$ , \*\* $p < 0.01$ , \*  $p < 0.05$ . in comparison to the survival curve of *TP53*<sup>-/-</sup> + DNA-PKi. **i**, Graphical summary

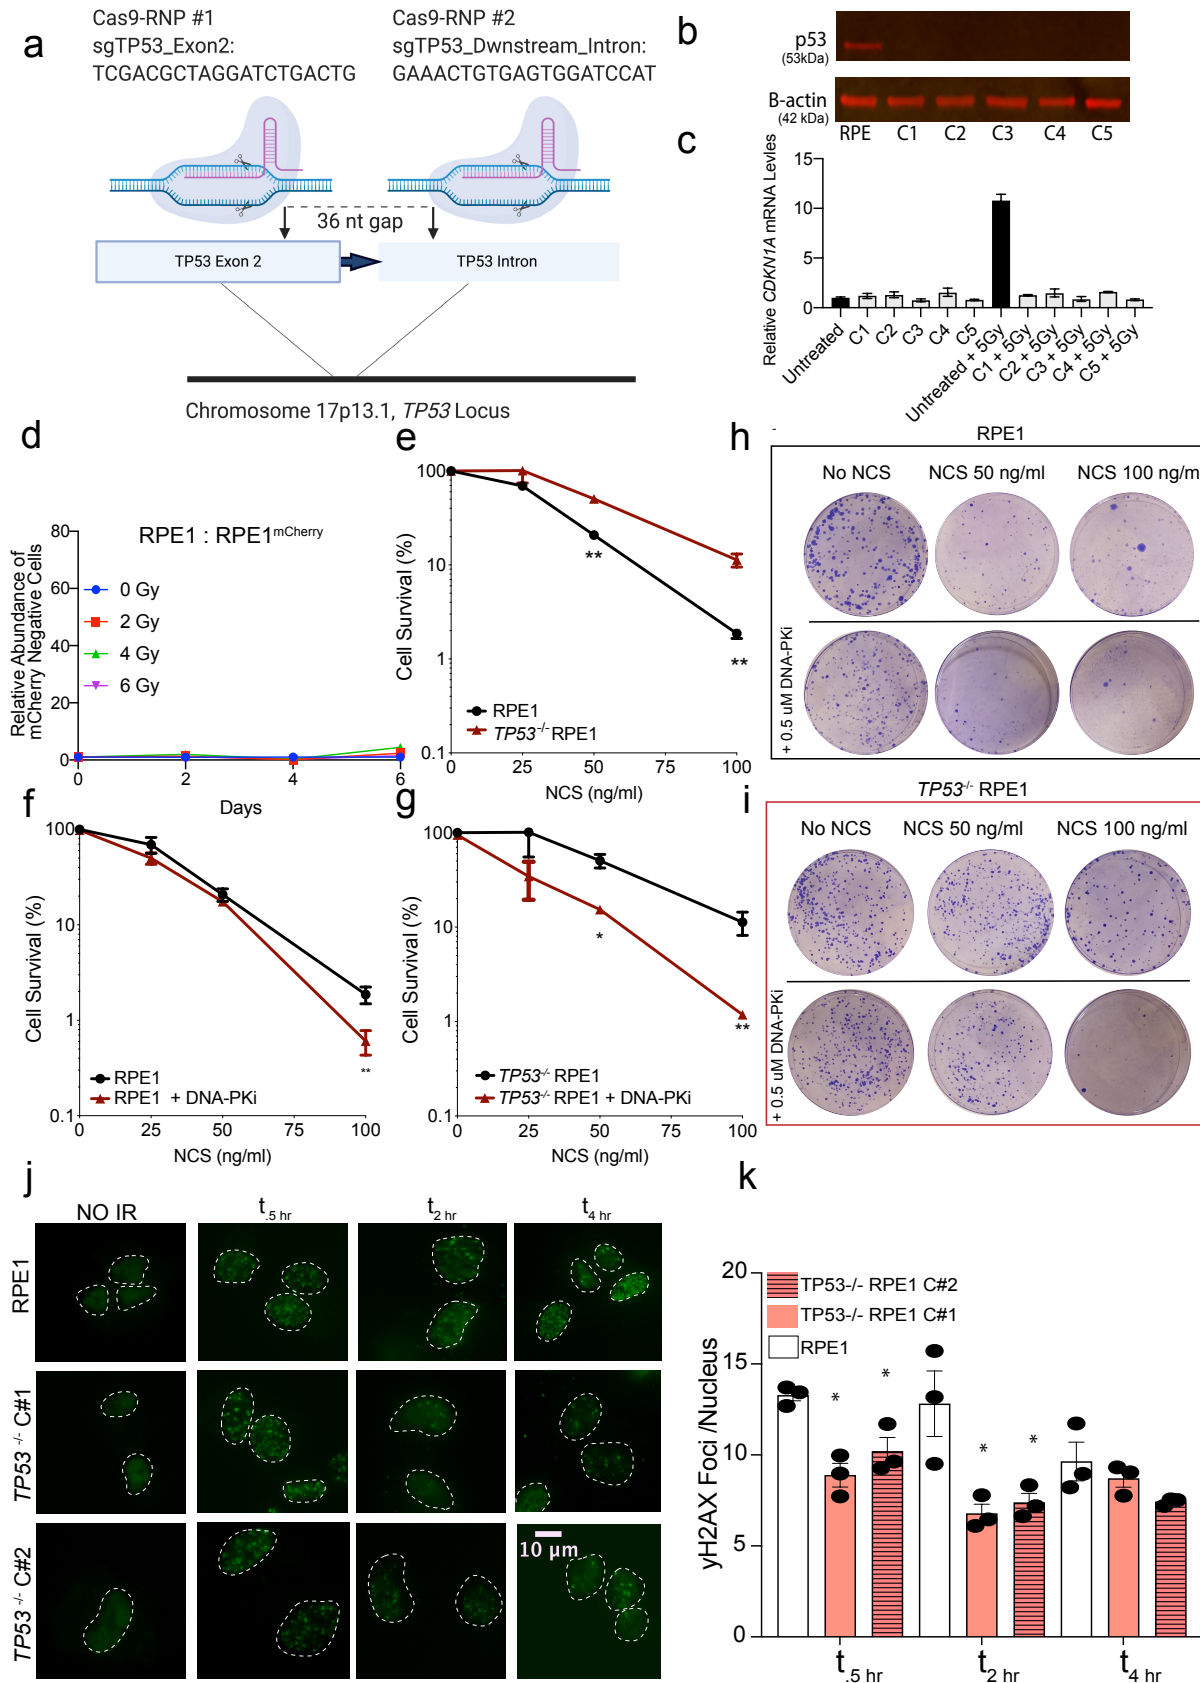

Supplementary Figure 1

**Supplementary Figure 1 | a**, Schematic of CRISPR target locus in human *TP53* gene. Two sgRNAs were designed to target sites in the terminal region of exon 2 (which encodes the p53 transactivating domain) and a site in the downstream intron with a 36 nucleotide (nt) gap. sgRNAs were complexed with Cas9 in the RNP system and electroporated into RPE1 cells. **b**, Western Blot of 5 selected single-cell clones that were profiled for p53 protein. **c**, Functional assay evaluating p53-dependent *CDKN1A* transcriptional responses to treatment of 5Gy IR. RNA from cells exposed to IR were harvested 6 hrs post treatment. **d**, Relative abundance of unlabeled RPE1<sup>unlabelled</sup> over RPE1<sup>mCherry</sup> measured by Intellicyte high-throughput cytometry +/- SEM (n=6) is shown, normalized to the untreated (0Gy) cohort at each time point. **e**, Clonogenic survival assays performed in RPE1 vs *TP53*<sup>-/-</sup> RPE1 cells exposed to NCS. **f**, Clonogenic survival assays of RPE1 treated NCS +/- 0.5 uM DNA-PKi. Reported values are mean of n = 3 replicates, and survival fraction was calculated by first calculating plating efficiency and normalizing it to the untreated samples. **g**, *TP53*<sup>-/-</sup> RPE1 cells were treated with NCS +/- 0.5 uM DNA-PKi. **h,i**, Representative colony forming plates for e and f at NCS doses of 0, 50 and 100 ng/ mL +/- 0.5 uM DNA-PKi. Cell numbers for each conditions plated are the following: UT (500), NCS 50 ng/ ml (2000), NCS 100 ng/ ml (6000). **j**, Representative immunofluorescence images of  $\gamma$ H2AX foci in cells with indicated genotypes untreated (no IR) or treated with IR (5Gy) and collected at .5, 2, and 4 h after irradiation. **k**, Quantification of  $\gamma$ H2AX foci. Data shown are mean (n= 50 cells per treatment condition) +/- SEM (n=3), and are consistent across two independent biological replicates. \* $p < 0.05$  by two-tailed Student's t-test.

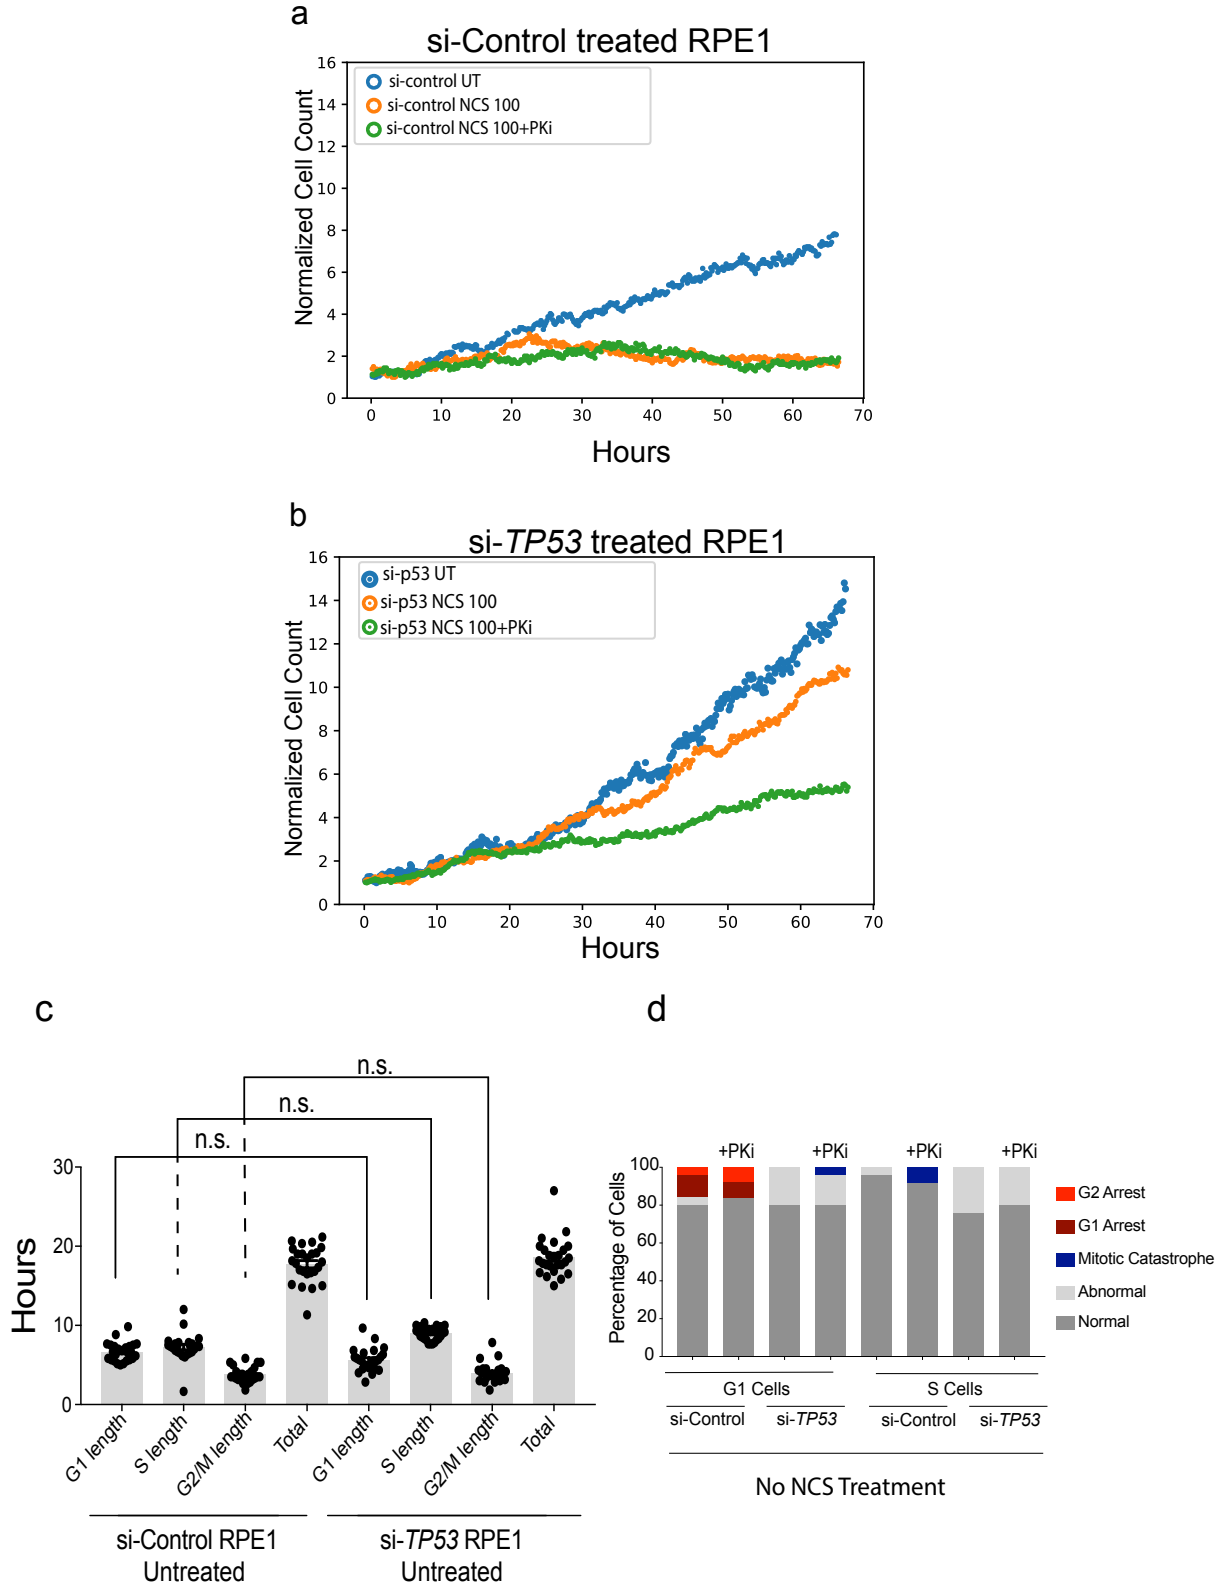

Supplementary Figure 2

**Supplementary Figure 2 | a**, Quantification of cell proliferation from live-cell imaging experiments for si-Control treated RPE1. Cell counts were normalized to cell numbers at start of imaging. Here we show one representative imaging beacon for each treatment condition (untreated, NCS 100 ng/ml at 18 hours, and NCS 100 ng/ml + 0.5 uM DNA-PKi at 18 hours). **b**, Cell proliferation counts for si-*TP53* treated RPE1 over live-cell imaging. **c**, Analysis of RPE1 with no exposure to NCS (untreated) but received si-Control or si-*TP53* 3 days prior to imaging. No significant differences are seen due to si-treatment alone. **d**, Quantification of baseline mitotic outcomes with no NCS exposure over the course of imaging. DNA-PKi treatment alone with no NCS showed no little to no additional effect on cells (Chi-squared analysis  $P > 0.05$  for each condition).



**Please refer to the following file names for the Supplementary Figure 3 Video Files:**  
Each video is a split screen of the same cell depicted in 2 channels: PCNA (left) and 53BP1 (right)

**3a:** NormalMitosis.mp4

**3b:** TransientG2Delay.mp4

**3c:** G1Arrest.mp4

**Supplementary Figure 3 | a, Normal Mitosis:** RPE1 Cell cycle representative of normal mitosis, with NCS treatment only. For all cells in this figure both the PCNA and the 53BP1 channels are shown as two individual movies. **b, Transient G2 Delay:** RPE1 cell cycle representative of a transient cell cycle delay in G2 (length of G2 is significantly prolonged in comparison to untreated cells). This cell was treated with NCS and DNA-PKi. **c, G1 Arrest:** RPE1 cell cycle representative of a permanent G1 arrest. This is a p53 proficient cell treated with NCS and DNA-PKi.

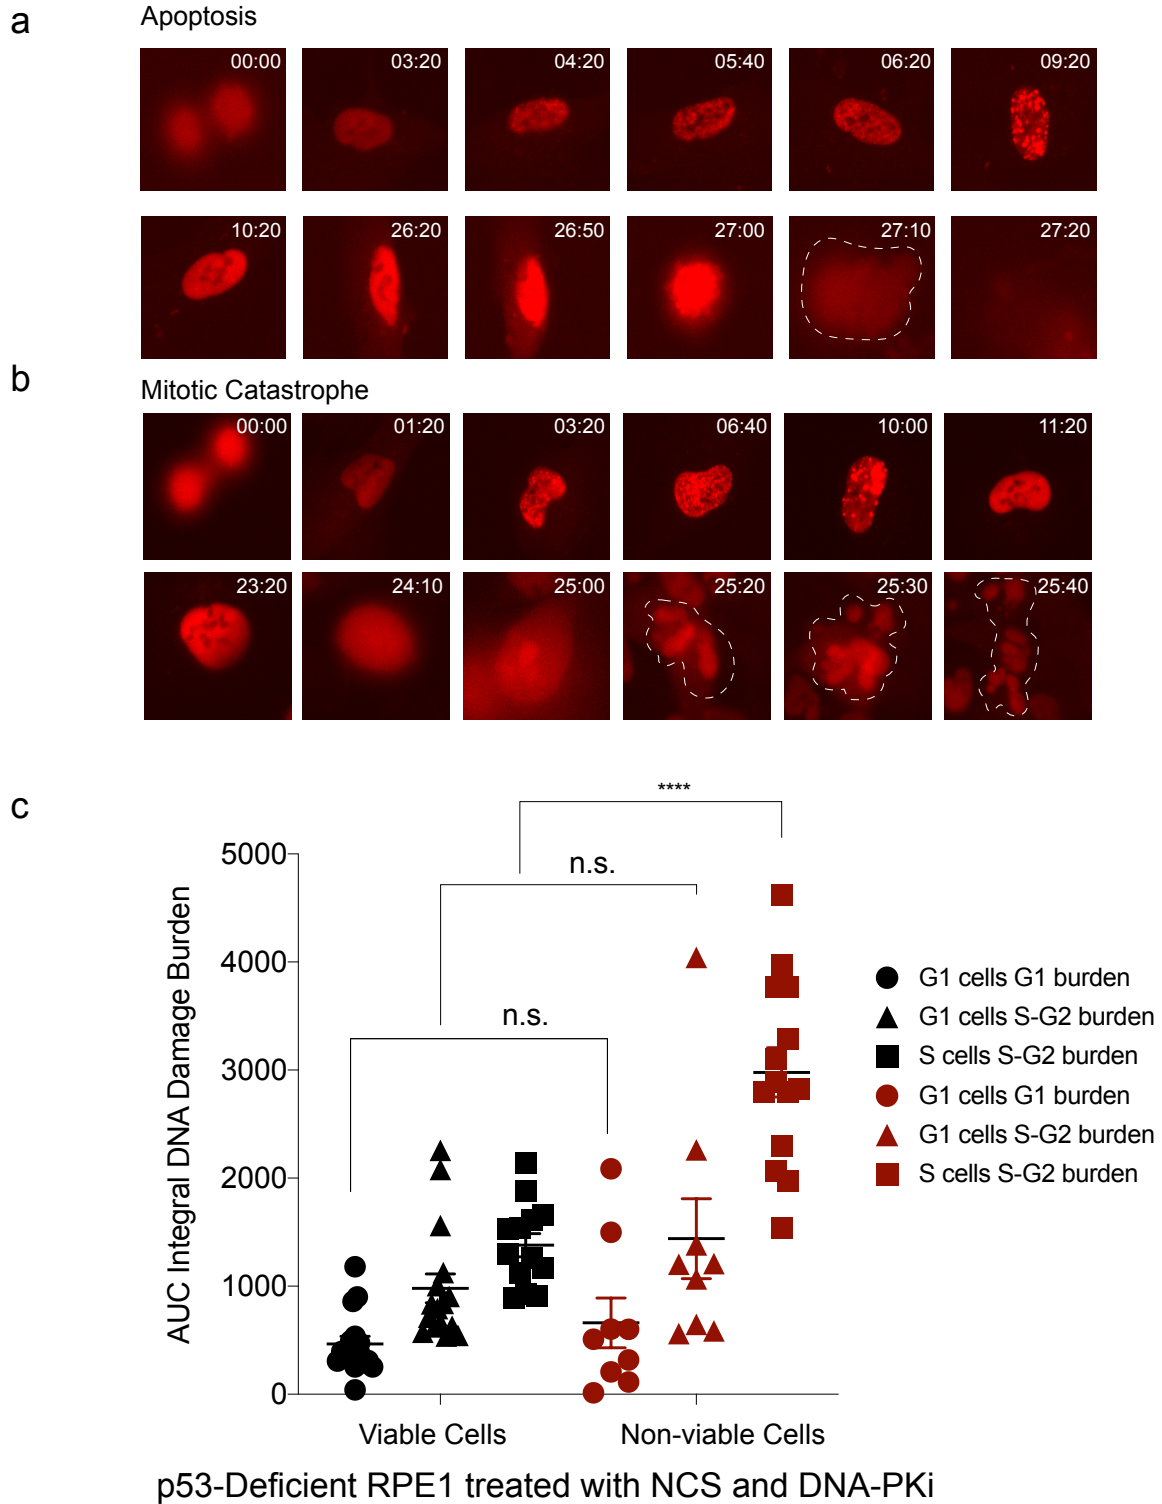

Supplementary Figure 4

**Supplementary Figure 4** | **a**, Time stamped image sequence of apoptotic cell (PCNA channel shown). Cells that experienced nuclear degradation during cell cycle prior to mitosis were categorized as “apoptotic cells.” In this sequence a cell in G2 experiences cell death at 27 hours post birth, with indication of mitotic attempt, with nuclear envelope collapse or presence of any daughter cells. **b**, Time stamped image sequence of cell that experienced mitotic catastrophe (PCNA channel shown). Cell undergoes nuclear envelope collapse (24:10), and attempts mitosis, in subsequent images fragmentation of nucleus is clearly visible with no viable daughter cells present. Cell non-viability during mitosis was defined as mitotic catastrophe. **c**, Integral DNA damage burden for p53-deficient cells treated with NCS (100 ng/ml) and DNA-PKi (.5 uM) are calculated and segregated by viable (black) vs. non-viable outcomes (red). Legend indicates which phase of cell cycle the cells are in during drug exposure, followed by the phase for which the burden is calculated. Ex: G1 cells G1 burden = cells in G1 during drug exposure and total damage burden in G1. Area under the curve (AUC) analysis was performed by plotting 53BP1 foci counts over time for each cell and integrating burden over time. Statistical significance was determined using two-tailed Student’s t-test.

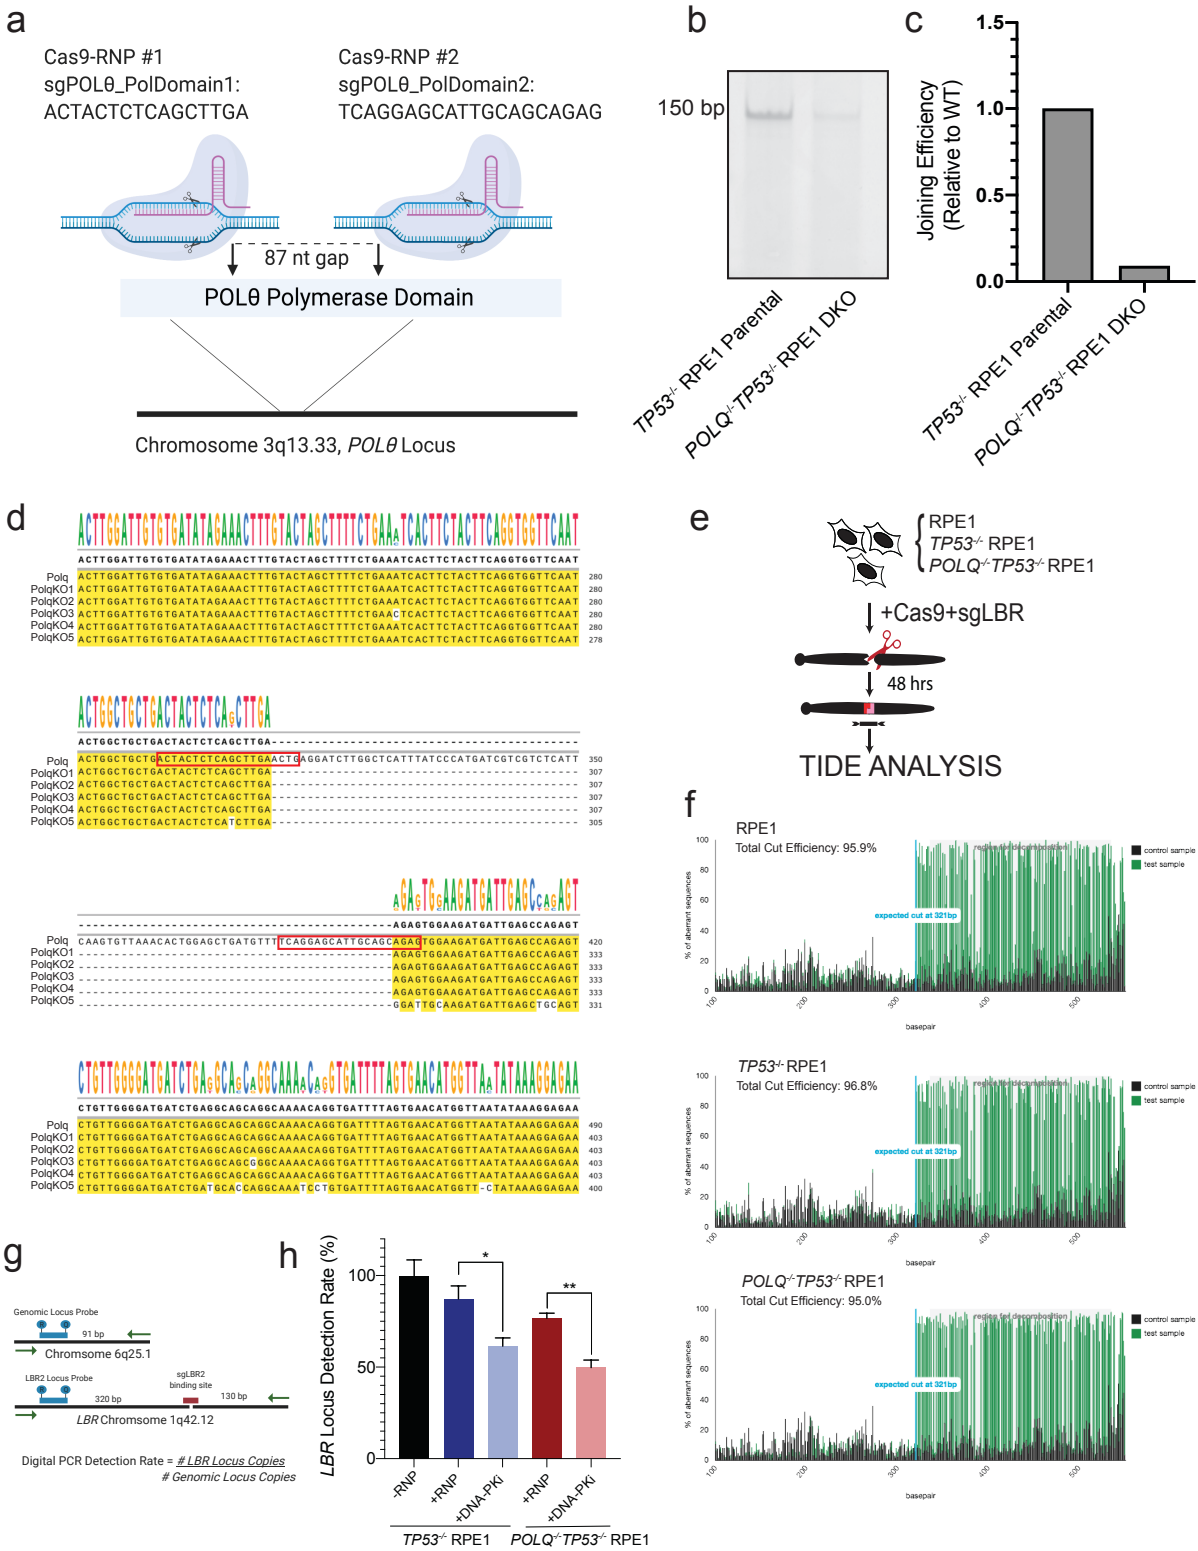

Supplementary Figure 5

**Supplementary Figure 5 | a**, Schematic of CRISPR target locus in human *POLQ* gene. Two sgRNAs were designed to target sites in the polymerase domain, with an 87 nucleotide (nt) gap. sgRNAs were complexed with Cas9 in RNP system and electroporated into RPE1 cells with a *TP53*<sup>-/-</sup> background to create double knockout cell line. **b,c** *POLQ* specific substrates were introduced into the *TP53*<sup>-/-</sup> vs. *POLQ*<sup>-/-</sup>*TP53*<sup>-/-</sup> DKO cells to assess repair efficiency. Products were amplified and characterized by electrophoresis and end joining efficiency was normalized to RPE1 with *POLQ* expression. **d**, Sanger sequencing analysis of CRISPR edited locus in *POLQ*<sup>-/-</sup> *TP53*<sup>-/-</sup> RPE1 clones. The locus of interest was PCR-amplified and cloned into a TOPO vector for sequencing analyses. Each line of sequence shown was derived from a different TOPO clone and aligned to show differences. The *POLQ*<sup>-/-</sup>*TP53*<sup>-/-</sup> clone has 87bp deletion resulting in frameshift mutations. Red boxes indicated sgRNAs used for the CRISPR. **e**, Schematic showing evaluation of NGS samples by TIDE analysis for efficiency of cleavage at *LBR* target site across cell lines. **f**, RPE1, *TP53*<sup>-/-</sup>, and *POLQ*<sup>-/-</sup>*TP53*<sup>-/-</sup> RPE1 cutting efficiency, all three cell lines have comparable levels of cutting efficiency with sgLBR. **g**, Schematic depicting digital PCR method for assessing LBR detection rate. **h**, Results of digital PCR assay on *TP53*<sup>-/-</sup> vs. *POLQ*<sup>-/-</sup>*TP53*<sup>-/-</sup> cells with <sup>-/+</sup>RNP and subsequently <sup>-/+</sup> DNA-PKi (3uM). Average of 3 independent biological replicates are shown with SEM. Statistical significance was calculated using Multiple-t tests. \*p<0.05, \*\*p<0.01.
